# Supplementary material for: Theoretical investigations toward TMEDA-catalyzed [2 + 4] annulation of allenoate with 1-aza-1,3-diene: mechanism, regioselectivity, and role of the catalyst
Source: Royal Society of Chemistry journal article supplement (doi:10.1039/c6ra09507k), 2016-01-01
Supplement: c6ra09507k1.pdf [file c6ra09507k1.pdf]

## Supporting Information

### Theoretical Investigations toward TMEDA-Catalyzed [2 + 4] Annulation of Allenolate with 1-Aza-1,3-Diene: Mechanism, Regioselectivity, and Role of Catalyst

Yan Qiao,<sup>†</sup> Wanjing Yang,<sup>†</sup> Donghui Wei<sup>\*,‡</sup> and Junbiao Chang<sup>\*,†</sup>

<sup>†</sup>Department of Pathophysiology, School of Basic Medical Sciences, and <sup>‡</sup>The College of Chemistry and Molecular Engineering, Zhengzhou University, Zhengzhou, Henan 450001, China.

E-mail: [donghuiwei@zzu.edu.cn](mailto:donghuiwei@zzu.edu.cn), [changjunbiao@zzu.edu.cn](mailto:changjunbiao@zzu.edu.cn)

## Supporting Information

### Table of Contents

|                                                                                                                                                                                                                   |    |
|-------------------------------------------------------------------------------------------------------------------------------------------------------------------------------------------------------------------|----|
| <b>Table 1.</b> The ZPE, $\delta G$ , E+ZPE, and G (stationary points) at the M06-2X/6-31G(d, p) level in gas phase and E at M06-2X/6-311++G (d, p) level in toluene solvent using IEFPCM model (unit: a.u.)..... | S2 |
| Cartesian Coordinates of all stationary points at M06-2X/6-31G(d, p) level.....                                                                                                                                   | S3 |

**Table 1.** The ZPE,  $\delta G$ , E, E+ZPE, and G of SP (stationary points) at the M06-2X/6-31G (d,p) level in gas phase, and E at B2, i.e. M06-2X/6-311++G (d,p) level in solvent toluene (unit: a.u.)

| SP           | $\delta E$ | $\delta G$ | E+ZPE        | G            | E/B2           |
|--------------|------------|------------|--------------|--------------|----------------|
| <b>R1</b>    | 0.183147   | 0.144974   | -575.167648  | -575.205821  | -575.50577332  |
| <b>R2</b>    | 0.354741   | 0.296814   | -1563.576222 | -1563.634150 | -1564.27411681 |
| <b>TMEDA</b> | 0.225187   | 0.189326   | -347.355673  | -347.391533  | -347.66895566  |
| <b>TS1A</b>  | 0.412824   | 0.363472   | -922.517188  | -922.566541  | -923.169351315 |
| <b>M1A</b>   | 0.415789   | 0.365982   | -922.527364  | -922.577172  | -923.1853396   |
| <b>TS2A</b>  | 0.773345   | 0.693328   | -2486.135438 | -2486.215455 | -2487.48478409 |
| <b>M2A</b>   | 0.775403   | 0.693918   | -2486.156893 | -2486.238379 | -2487.51080735 |
| <b>TS3A</b>  | 0.770676   | 0.689410   | -2486.137524 | -2486.218790 | -2487.49017863 |
| <b>M3A</b>   | 0.775881   | 0.695307   | -2486.158182 | -2486.238757 | -2487.51033162 |
| <b>TS4A</b>  | 0.771256   | 0.691847   | -2486.118653 | -2486.198062 | -2487.46731249 |
| <b>M4A</b>   | 0.776095   | 0.694765   | -2486.131603 | -2486.212933 | -2487.49623699 |
| <b>TS5A</b>  | 0.774577   | 0.695709   | -2486.134978 | -2486.213846 | -2487.48438016 |
| <b>M5A</b>   | 0.773026   | 0.690747   | -2486.213072 | -2486.295351 | -2487.55495261 |
| <b>TS6A</b>  | 0.769652   | 0.690707   | -2486.199252 | -2486.278197 | -2487.53703282 |
| <b>M6A</b>   | 0.775795   | 0.697122   | -2486.202353 | -2486.281026 | -2487.55074550 |
| <b>TS7A</b>  | 0.773589   | 0.694214   | -2486.199220 | -2486.278594 | -2487.54777102 |
| <b>P</b>     | 0.771859   | 0.690140   | -2486.288884 | -2486.370603 | -2487.62864193 |
| <b>TS3B</b>  | 0.774017   | 0.694758   | -2486.104425 | -2486.183684 | -2487.48135209 |
| <b>M3B</b>   | 0.772517   | 0.686619   | -2486.200636 | -2486.286534 | -2487.54531929 |
| <b>TS4B</b>  | 0.567128   | 0.497771   | -2215.143698 | -2215.213055 | -2216.25266503 |
| <b>M4B</b>   | 0.546463   | 0.478173   | -2138.841051 | -2138.909341 | -2139.87406709 |
| <b>M3C</b>   | 0.789366   | 0.706480   | -2486.602485 | -2486.685371 | -2487.98644090 |
| <b>TS4C</b>  | 0.782253   | 0.700576   | -2486.582271 | -2486.663948 | -2487.94837355 |
| <b>M4C</b>   | 0.786272   | 0.705112   | -2486.587266 | -2486.668426 | -2487.95770998 |
| <b>TS5C</b>  | 0.782263   | 0.698657   | -2486.585898 | -2486.669504 | -2487.94908729 |
| <b>M5C</b>   | 0.789884   | 0.705207   | -2486.621428 | -2486.706104 | -2487.99731375 |
| <b>TS2A'</b> | 0.772529   | 0.688867   | -2486.120823 | -2486.204485 | -2487.46994126 |
| <b>M2A'</b>  | 0.775953   | 0.692653   | -2486.144983 | -2486.228284 | -2487.504041   |

Cartesian Coordinate for all stationary points

R1

|   |             |             |             |
|---|-------------|-------------|-------------|
| C | -4.13891200 | 0.26480500  | -0.70213700 |
| C | -5.43211700 | 0.23118800  | -0.57248300 |
| C | -2.83458800 | 0.29784200  | -0.83018700 |
| H | -5.99473100 | -0.66088800 | -0.82899400 |
| H | -5.97662800 | 1.09044400  | -0.19369300 |
| H | -2.36160800 | 0.62621000  | -1.75005400 |
| C | -1.95615700 | -0.11948600 | 0.29343400  |
| O | -2.32084000 | -0.50633400 | 1.37609000  |
| O | -0.66313700 | -0.00664900 | -0.06369100 |
| C | 0.27420600  | -0.38679500 | 0.95766800  |
| H | 0.08297000  | 0.21511000  | 1.85109900  |
| H | 0.10277000  | -1.43526500 | 1.22001000  |
| C | 1.65704200  | -0.16480800 | 0.41571000  |
| C | 2.32753500  | -1.18998300 | -0.25146100 |
| C | 2.27328300  | 1.08022200  | 0.54599500  |
| C | 3.59705600  | -0.97616900 | -0.77943800 |
| H | 1.84979400  | -2.16050300 | -0.35619000 |
| C | 3.54224100  | 1.29824500  | 0.01924000  |
| H | 1.75261700  | 1.88090400  | 1.06460700  |
| C | 4.20587600  | 0.26889200  | -0.64422400 |
| H | 4.11213400  | -1.78085100 | -1.29416400 |
| H | 4.01451300  | 2.26921000  | 0.12890900  |
| H | 5.19719600  | 0.43577200  | -1.05340700 |

R2

|   |             |             |             |
|---|-------------|-------------|-------------|
| C | 3.09001700  | 0.88060900  | -0.64074600 |
| C | 2.26305200  | 0.20025400  | 0.15723400  |
| H | 2.78198000  | 1.81006700  | -1.10954600 |
| H | 2.58300300  | -0.73054400 | 0.61609800  |
| C | 0.88089900  | 0.65911700  | 0.45563800  |
| C | 4.47663000  | 0.44022800  | -0.94450700 |
| O | 5.22582000  | 1.06137300  | -1.65875200 |
| O | 4.80520200  | -0.71552500 | -0.34523500 |
| C | 6.13997200  | -1.17639800 | -0.60385400 |
| C | 6.31226500  | -2.48686600 | 0.13092500  |
| H | 6.84661300  | -0.41401500 | -0.26248800 |
| H | 6.27093900  | -1.28629500 | -1.68443500 |
| H | 7.31945100  | -2.87662900 | -0.03304400 |
| H | 6.16394900  | -2.34848200 | 1.20413400  |
| H | 5.59195500  | -3.22590300 | -0.22690600 |
| C | 0.03948900  | -0.30841700 | 1.22142700  |
| C | -0.42224900 | 0.00903900  | 2.50054400  |

|   |             |             |             |
|---|-------------|-------------|-------------|
| C | -0.24727100 | -1.55574600 | 0.65936300  |
| C | -1.17940800 | -0.92215700 | 3.20659900  |
| H | -0.20548900 | 0.98377800  | 2.92408900  |
| C | -1.03076400 | -2.46664500 | 1.35741300  |
| H | 0.12119200  | -1.79570400 | -0.33458300 |
| C | -1.49243000 | -2.15182900 | 2.63458600  |
| H | -1.53218000 | -0.67956800 | 4.20371000  |
| H | -1.27691600 | -3.42346900 | 0.90862900  |
| H | -2.09404600 | -2.86848000 | 3.18445600  |
| N | 0.55055400  | 1.82549900  | 0.03608200  |
| S | -1.02443300 | 2.46362500  | 0.17400000  |
| O | -1.27804600 | 2.79501200  | 1.56983000  |
| O | -1.06856800 | 3.48279300  | -0.85562200 |
| C | -2.11511000 | 1.15107400  | -0.30998800 |
| C | -2.99990200 | 0.60440300  | 0.61869000  |
| C | -2.05206200 | 0.67420900  | -1.61263600 |
| C | -3.81141500 | -0.44810900 | 0.23803000  |
| H | -3.02829500 | 1.00344200  | 1.62686200  |
| C | -2.85931900 | -0.39209500 | -1.99682900 |
| H | -1.37500900 | 1.13405800  | -2.32642000 |
| C | -3.73628300 | -0.95801400 | -1.06517700 |
| H | -4.50955600 | -0.90481300 | 0.93050300  |
| H | -2.80412300 | -0.76295300 | -3.01258400 |
| O | -4.55688400 | -1.99990500 | -1.33041400 |
| C | -4.53852900 | -2.53982300 | -2.63610100 |
| H | -3.54839800 | -2.93711200 | -2.88852000 |
| H | -5.26523500 | -3.35117600 | -2.63784900 |
| H | -4.82847300 | -1.78968600 | -3.38079400 |

TMEDA

|   |             |             |             |
|---|-------------|-------------|-------------|
| N | -1.84940300 | 0.06315800  | -0.32481700 |
| C | -0.60065400 | 0.35644500  | 0.36492400  |
| H | -0.41848200 | 1.43150000  | 0.26266500  |
| H | -0.66817100 | 0.14562300  | 1.44994100  |
| C | 0.58395300  | -0.41511200 | -0.21094600 |
| H | 0.55040000  | -0.35853500 | -1.31603100 |
| H | 0.49164700  | -1.47214900 | 0.05991900  |
| C | -2.25278100 | -1.32182400 | -0.15068200 |
| H | -3.21553000 | -1.48358600 | -0.64290400 |
| H | -1.52827900 | -1.99674500 | -0.61213600 |
| H | -2.35996600 | -1.60096000 | 0.91513300  |
| C | -2.90064700 | 0.94990200  | 0.14108100  |
| H | -2.61224900 | 1.99015900  | -0.03413800 |
| H | -3.82243900 | 0.75290900  | -0.41345900 |

|   |             |             |             |
|---|-------------|-------------|-------------|
| H | -3.11518300 | 0.82831000  | 1.21950300  |
| N | 1.85296200  | 0.06178200  | 0.32647900  |
| C | 2.27368000  | 1.30333100  | -0.30156400 |
| H | 3.19876800  | 1.65385900  | 0.16451400  |
| H | 2.45555000  | 1.18389900  | -1.38609400 |
| H | 1.51979800  | 2.08182900  | -0.16837200 |
| C | 2.89264900  | -0.94077400 | 0.17006500  |
| H | 3.08654900  | -1.19391800 | -0.88910000 |
| H | 3.82603100  | -0.57238800 | 0.60523700  |
| H | 2.60944900  | -1.85619700 | 0.69641700  |

TS1A

|   |             |             |             |
|---|-------------|-------------|-------------|
| C | 2.63964600  | -1.05600000 | -0.76754100 |
| C | 3.88746300  | -1.43023200 | -0.99587300 |
| C | 1.37478900  | -1.23276700 | -1.28625800 |
| H | 4.04458400  | -2.24263100 | -1.69627600 |
| H | 4.76582200  | -0.98242300 | -0.54976000 |
| C | 0.32877500  | -1.85383900 | -0.54279100 |
| O | 0.36999800  | -2.21930800 | 0.63222000  |
| O | -0.81173300 | -1.99432500 | -1.28485200 |
| C | -1.97171200 | -2.42670300 | -0.56755200 |
| H | -2.61084300 | -2.90169900 | -1.31527400 |
| H | -1.68069300 | -3.15880200 | 0.18856200  |
| C | -2.67333900 | -1.24498700 | 0.05827100  |
| C | -3.69624200 | -0.58731800 | -0.62648100 |
| C | -2.24998200 | -0.74290100 | 1.29337900  |
| C | -4.28697900 | 0.55579300  | -0.09329000 |
| H | -4.02837600 | -0.97268900 | -1.58722000 |
| C | -2.82867800 | 0.40797500  | 1.81964300  |
| H | -1.44947800 | -1.25484400 | 1.81832100  |
| C | -3.84768100 | 1.05989200  | 1.12804300  |
| H | -5.08513200 | 1.05589600  | -0.63333300 |
| H | -2.48548700 | 0.79695900  | 2.77325100  |
| H | -4.29914900 | 1.95642200  | 1.54125000  |
| N | 2.71645000  | 0.12830200  | 0.74585800  |
| C | 1.46765200  | 0.91869400  | 0.77742200  |
| H | 0.63882500  | 0.21298200  | 0.71201000  |
| H | 1.39882800  | 1.42079600  | 1.75191000  |
| C | 1.38537300  | 1.96659000  | -0.33079900 |
| H | 1.71420800  | 1.52989800  | -1.29224400 |
| H | 2.06764100  | 2.79216900  | -0.09853000 |
| C | 3.89135400  | 1.01461400  | 0.72044600  |
| H | 4.79342100  | 0.43218000  | 0.90891700  |
| H | 3.97582400  | 1.50308800  | -0.25104000 |

|   |             |             |             |
|---|-------------|-------------|-------------|
| H | 3.80569100  | 1.77358200  | 1.50927300  |
| C | 2.78601900  | -0.75559000 | 1.92565300  |
| H | 1.90638200  | -1.39919400 | 1.92617000  |
| H | 3.68094500  | -1.37548500 | 1.84227700  |
| H | 2.83977700  | -0.15405100 | 2.84219700  |
| N | 0.03864800  | 2.51031800  | -0.40372000 |
| C | -0.85819300 | 1.63024900  | -1.14122800 |
| H | -1.88196400 | 2.00721500  | -1.06818200 |
| H | -0.57996800 | 1.55887800  | -2.20924900 |
| H | -0.84778900 | 0.62079200  | -0.72789000 |
| C | 0.03727000  | 3.83287300  | -1.00346200 |
| H | 0.41776500  | 3.83154800  | -2.04191400 |
| H | -0.98453800 | 4.22147600  | -1.02056900 |
| H | 0.65295800  | 4.51562400  | -0.41079300 |
| H | 1.16572800  | -0.88701100 | -2.29125600 |

M1A

|   |             |             |             |
|---|-------------|-------------|-------------|
| C | 2.60270500  | -0.87903300 | -0.78981200 |
| C | 3.61871300  | -0.91812500 | -1.68200600 |
| C | 1.28673300  | -1.36382800 | -1.05075700 |
| H | 3.43737900  | -1.42572700 | -2.61990600 |
| H | 4.58261700  | -0.45201700 | -1.56295400 |
| C | 0.19337000  | -1.68211300 | -0.23077700 |
| O | 0.02458400  | -1.54569900 | 0.99878200  |
| O | -0.83657400 | -2.21529800 | -0.97983600 |
| C | -2.04019800 | -2.44939500 | -0.26308600 |
| H | -2.61814400 | -3.12057500 | -0.90479600 |
| H | -1.82812300 | -2.94923900 | 0.68530600  |
| C | -2.81133300 | -1.17360500 | -0.01810900 |
| C | -3.31108900 | -0.44771000 | -1.10132600 |
| C | -3.02267300 | -0.69591000 | 1.27424600  |
| C | -4.03241000 | 0.72405600  | -0.89559000 |
| H | -3.12735100 | -0.80969200 | -2.10983200 |
| C | -3.74821700 | 0.47413200  | 1.48515100  |
| H | -2.59170300 | -1.23812500 | 2.11072300  |
| C | -4.25887900 | 1.18316900  | 0.40116700  |
| H | -4.42123800 | 1.27801800  | -1.74477500 |
| H | -3.90841700 | 0.83727000  | 2.49564700  |
| H | -4.82483900 | 2.09521400  | 0.56502600  |
| N | 2.89566300  | -0.24173600 | 0.56085500  |
| C | 1.83724400  | 0.78480900  | 0.91703100  |
| H | 0.91284700  | 0.22691100  | 1.05060500  |
| H | 2.13234800  | 1.20381800  | 1.88353500  |
| C | 1.69880900  | 1.88686300  | -0.12786600 |

|   |              |              |              |
|---|--------------|--------------|--------------|
| H | 1. 77062700  | 1. 45900400  | -1. 14410100 |
| H | 2. 50919300  | 2. 61715200  | -0. 01516700 |
| C | 4. 22629900  | 0. 42905600  | 0. 61836900  |
| H | 5. 00861100  | -0. 31518600 | 0. 48281700  |
| H | 4. 28728500  | 1. 18517400  | -0. 16155800 |
| H | 4. 31735500  | 0. 88982900  | 1. 60223300  |
| C | 2. 90177900  | -1. 33329100 | 1. 59520200  |
| H | 1. 89969000  | -1. 76109600 | 1. 64331500  |
| H | 3. 64300700  | -2. 06866800 | 1. 28095500  |
| H | 3. 18017900  | -0. 88822600 | 2. 55328600  |
| N | 0. 44037600  | 2. 58504800  | 0. 08675200  |
| C | -0. 70160300 | 1. 78891200  | -0. 35747200 |
| H | -1. 61988200 | 2. 35654300  | -0. 18838900 |
| H | -0. 63820200 | 1. 53167000  | -1. 42977800 |
| H | -0. 78797900 | 0. 85853500  | 0. 20973900  |
| C | 0. 45048100  | 3. 86591600  | -0. 59947400 |
| H | 0. 56277900  | 3. 76255200  | -1. 69460600 |
| H | -0. 48882700 | 4. 38940400  | -0. 40399400 |
| H | 1. 27144600  | 4. 48570700  | -0. 22643200 |
| H | 1. 14461000  | -1. 62687100 | -2. 09106500 |

#### TS2A

|   |              |              |              |
|---|--------------|--------------|--------------|
| C | 0. 95958800  | 1. 62474600  | 0. 46546400  |
| C | 0. 15622900  | 1. 51387400  | 1. 54702200  |
| C | 1. 90976000  | 0. 59305900  | 0. 16110200  |
| H | 0. 32180300  | 0. 68455500  | 2. 22223400  |
| H | -0. 64007900 | 2. 19959000  | 1. 79322000  |
| C | 3. 01873400  | 0. 52456500  | -0. 75896100 |
| O | 3. 23189100  | 1. 15880700  | -1. 79045500 |
| O | 3. 88323700  | -0. 45212200 | -0. 36999500 |
| C | 4. 89484900  | -0. 77710600 | -1. 33212100 |
| H | 4. 41387300  | -1. 15363000 | -2. 23915300 |
| H | 5. 44650300  | 0. 13355800  | -1. 58760400 |
| C | 5. 79683200  | -1. 80697700 | -0. 71101900 |
| C | 6. 54392100  | -1. 48635700 | 0. 42553200  |
| C | 5. 89309000  | -3. 08977800 | -1. 24710400 |
| C | 7. 36703100  | -2. 43487800 | 1. 02054900  |
| H | 6. 46210000  | -0. 48782900 | 0. 84799800  |
| C | 6. 72046200  | -4. 04311300 | -0. 65555600 |
| H | 5. 30415400  | -3. 34305300 | -2. 12522000 |
| C | 7. 45674200  | -3. 71736600 | 0. 47956900  |
| H | 7. 94094100  | -2. 17680700 | 1. 90493100  |
| H | 6. 78821100  | -5. 03930100 | -1. 08121200 |
| H | 8. 10195200  | -4. 45842500 | 0. 94081100  |

|   |              |              |              |
|---|--------------|--------------|--------------|
| N | 0. 80670200  | 2. 82172200  | -0. 44002900 |
| C | 2. 10157300  | 3. 61287500  | -0. 48747000 |
| H | 2. 79669300  | 3. 00902900  | -1. 06523000 |
| H | 1. 88073900  | 4. 51964500  | -1. 05558200 |
| C | 2. 67768700  | 3. 97468500  | 0. 87851200  |
| H | 2. 62506800  | 3. 11455700  | 1. 56779400  |
| H | 2. 09925200  | 4. 78945700  | 1. 32742100  |
| C | -0. 28943000 | 3. 73759900  | 0. 00604800  |
| H | -1. 23931800 | 3. 20290900  | 0. 01711600  |
| H | -0. 05790200 | 4. 12204900  | 0. 99826800  |
| H | -0. 33401200 | 4. 55651400  | -0. 71154800 |
| C | 0. 46988300  | 2. 38799700  | -1. 84772200 |
| H | 1. 27970300  | 1. 76063900  | -2. 21346100 |
| H | -0. 48332900 | 1. 85987800  | -1. 82195100 |
| H | 0. 39354700  | 3. 29366300  | -2. 45200200 |
| N | 4. 04646000  | 4. 44078700  | 0. 69464300  |
| C | 4. 96285600  | 3. 32784200  | 0. 47152400  |
| H | 5. 97191100  | 3. 72074200  | 0. 32343600  |
| H | 4. 98204200  | 2. 62786400  | 1. 32755800  |
| H | 4. 69073100  | 2. 76330500  | -0. 42361300 |
| C | 4. 48110800  | 5. 21878100  | 1. 84351100  |
| H | 4. 47707500  | 4. 63328800  | 2. 78097100  |
| H | 5. 49828300  | 5. 58080800  | 1. 67345800  |
| H | 3. 82831700  | 6. 08609100  | 1. 97496800  |
| C | 0. 41505600  | -1. 01254500 | -0. 71819400 |
| C | -0. 59110800 | -1. 11331100 | 0. 21154700  |
| H | 0. 24973700  | -0. 46644300 | -1. 64104000 |
| H | -0. 48218600 | -1. 79753300 | 1. 04554500  |
| C | -1. 79358500 | -0. 34200200 | 0. 14640000  |
| C | 1. 51663700  | -2. 00659900 | -0. 79443300 |
| O | 2. 13864000  | -2. 23330100 | -1. 80821200 |
| O | 1. 74006200  | -2. 60160300 | 0. 38834600  |
| C | 2. 84471200  | -3. 51554800 | 0. 47350100  |
| C | 3. 67327800  | -3. 15798900 | 1. 68896600  |
| H | 3. 42971200  | -3. 44635500 | -0. 44314900 |
| H | 2. 42538100  | -4. 52404800 | 0. 54876800  |
| H | 4. 56294600  | -3. 79421300 | 1. 72954500  |
| H | 4. 00146600  | -2. 11909300 | 1. 61238500  |
| H | 3. 09998700  | -3. 28681200 | 2. 61066500  |
| C | -2. 84070400 | -0. 70067500 | 1. 16152700  |
| C | -3. 17008800 | 0. 12526300  | 2. 23677900  |
| C | -3. 49937900 | -1. 92377700 | 1. 00114400  |
| C | -4. 15594700 | -0. 27113700 | 3. 13772700  |
| H | -2. 67703600 | 1. 08431800  | 2. 34664700  |



|   |             |             |             |
|---|-------------|-------------|-------------|
| C | -4.49969100 | -2.30361800 | 1.88822500  |
| H | -3.23998300 | -2.55994700 | 0.15977000  |
| C | -4.82627100 | -1.47854600 | 2.96228300  |
| H | -4.40593300 | 0.37198700  | 3.97570400  |
| H | -5.02070200 | -3.24460600 | 1.74090700  |
| H | -5.60093700 | -1.77729100 | 3.66201300  |
| N | -1.96028900 | 0.52169900  | -0.83154800 |
| S | -3.26681700 | 1.51945800  | -0.94922500 |
| O | -3.33481300 | 2.39649300  | 0.23055500  |
| O | -3.14330200 | 2.14373500  | -2.26069400 |
| C | -4.71382000 | 0.49412900  | -0.93965000 |
| C | -4.86754700 | -0.47419300 | -1.93434900 |
| C | -5.63219700 | 0.61472700  | 0.09084600  |
| C | -5.93920000 | -1.34498900 | -1.86931700 |
| H | -4.14254400 | -0.54439900 | -2.73956200 |
| C | -6.71716700 | -0.25505400 | 0.15615900  |
| H | -5.47708900 | 1.37080400  | 0.85283000  |
| C | -6.86046400 | -1.24643400 | -0.81643900 |
| H | -6.09073600 | -2.11688400 | -2.61534800 |
| H | -7.42048300 | -0.16345100 | 0.97416400  |
| O | -7.85665100 | -2.16506500 | -0.82550500 |
| C | -8.78722200 | -2.12797300 | 0.23529400  |
| H | -9.33799500 | -1.18020900 | 0.25048400  |
| H | -9.48284600 | -2.94736800 | 0.05808000  |
| H | -8.29088200 | -2.27152700 | 1.20292300  |
| H | 2.04107600  | -0.08342000 | 0.99749000  |

## M2A

|   |             |             |             |
|---|-------------|-------------|-------------|
| C | 0.76716800  | 1.52424000  | 0.49117800  |
| C | 0.10175000  | 1.38735800  | 1.63434800  |
| C | 1.56186600  | 0.33583500  | -0.01790300 |
| H | 0.19928800  | 0.44875100  | 2.16599000  |
| H | -0.60675800 | 2.09802300  | 2.03164900  |
| C | 2.86939000  | 0.54862500  | -0.76619600 |
| O | 3.05472700  | 1.22433700  | -1.75401700 |
| O | 3.82006200  | -0.24297400 | -0.25283600 |
| C | 5.01409000  | -0.36484700 | -1.04910800 |
| H | 4.72560300  | -0.69691700 | -2.05163300 |
| H | 5.47615300  | 0.62480300  | -1.13555900 |
| C | 5.91384800  | -1.35226400 | -0.36109200 |
| C | 6.22292500  | -1.19338200 | 0.99217700  |
| C | 6.44264000  | -2.43558000 | -1.05985800 |
| C | 7.03977700  | -2.11354000 | 1.63871000  |
| H | 5.80095900  | -0.35442900 | 1.53932100  |

|   |             |             |             |
|---|-------------|-------------|-------------|
| C | 7.26795100  | -3.35491700 | -0.41499100 |
| H | 6.20028100  | -2.56527100 | -2.11165700 |
| C | 7.56312300  | -3.19757100 | 0.93534300  |
| H | 7.26801000  | -1.98771700 | 2.69220800  |
| H | 7.67274700  | -4.19709300 | -0.96702000 |
| H | 8.19928600  | -3.91709600 | 1.44051800  |
| N | 0.67200200  | 2.80568100  | -0.28789000 |
| C | 2.00354700  | 3.54873300  | -0.31344100 |
| H | 2.55930100  | 3.16928400  | -1.16463300 |
| H | 1.76608000  | 4.59863200  | -0.49262100 |
| C | 2.81839400  | 3.43040500  | 0.97125100  |
| H | 3.02906700  | 2.37359200  | 1.21737600  |
| H | 2.24688500  | 3.83833900  | 1.81247400  |
| C | -0.34319300 | 3.74133500  | 0.31338900  |
| H | -1.31107000 | 3.24941700  | 0.39164500  |
| H | 0.01782500  | 4.06920100  | 1.28825600  |
| H | -0.41964300 | 4.59246700  | -0.36133200 |
| C | 0.24532900  | 2.54326400  | -1.71631800 |
| H | 1.00638700  | 1.92547000  | -2.18730100 |
| H | -0.73382500 | 2.06067500  | -1.70233400 |
| H | 0.19465200  | 3.51421000  | -2.21181300 |
| N | 4.04675800  | 4.19419400  | 0.81580700  |
| C | 5.03755900  | 3.44381600  | 0.05611300  |
| H | 5.92243100  | 4.06471300  | -0.10370400 |
| H | 5.34932000  | 2.52256000  | 0.58639600  |
| H | 4.64653000  | 3.15186200  | -0.92170100 |
| C | 4.59405300  | 4.57662200  | 2.10838500  |
| H | 4.85415100  | 3.70411800  | 2.73437700  |
| H | 5.50039200  | 5.16807400  | 1.95614600  |
| H | 3.87259500  | 5.19173400  | 2.65214400  |
| C | 0.67819700  | -0.69118500 | -0.86500400 |
| C | -0.44981500 | -1.27686700 | -0.07223600 |
| H | 0.29967600  | -0.17873000 | -1.75145200 |
| H | -0.25620900 | -2.18699500 | 0.48394700  |
| C | -1.70339900 | -0.76793900 | -0.10442300 |
| C | 1.64738300  | -1.76072900 | -1.34609000 |
| O | 2.13321200  | -1.79845000 | -2.45199500 |
| O | 1.98477700  | -2.60157700 | -0.35785400 |
| C | 3.03230000  | -3.53792600 | -0.65038300 |
| C | 3.65711500  | -3.95119500 | 0.66271100  |
| H | 3.76090500  | -3.05583000 | -1.30717800 |
| H | 2.59799300  | -4.38451800 | -1.19177000 |
| H | 4.46517700  | -4.66457500 | 0.48105200  |
| H | 4.08090200  | -3.07683600 | 1.16402400  |

|   |              |             |             |
|---|--------------|-------------|-------------|
| H | 2.91790800   | -4.41525300 | 1.31982900  |
| C | -2.78627400  | -1.49989100 | 0.62967400  |
| C | -2.84564900  | -1.51628800 | 2.02172700  |
| C | -3.77497100  | -2.16353800 | -0.10483900 |
| C | -3.87897500  | -2.18778000 | 2.67450100  |
| H | -2.09239100  | -0.97585200 | 2.58700500  |
| C | -4.80177500  | -2.83739400 | 0.54408300  |
| H | -3.73662000  | -2.12600500 | -1.18964200 |
| C | -4.85581800  | -2.85004100 | 1.93798500  |
| H | -3.92188400  | -2.18853400 | 3.75953700  |
| H | -5.56751700  | -3.34372700 | -0.03635500 |
| H | -5.66164100  | -3.37073300 | 2.44705700  |
| N | -2.01469100  | 0.32581200  | -0.89173900 |
| S | -3.02710700  | 1.41834500  | -0.32306000 |
| O | -2.80269900  | 1.71988900  | 1.11215600  |
| O | -2.94825300  | 2.57368300  | -1.23339500 |
| C | -4.70678700  | 0.81964100  | -0.41009800 |
| C | -5.25249200  | 0.50449100  | -1.65581000 |
| C | -5.41890600  | 0.58483000  | 0.75462600  |
| C | -6.50764300  | -0.07181800 | -1.72440400 |
| H | -4.68047100  | 0.70285900  | -2.55730600 |
| C | -6.68622000  | 0.00814400  | 0.69325500  |
| H | -4.96237500  | 0.82677400  | 1.70846000  |
| C | -7.22228000  | -0.33501100 | -0.54752700 |
| H | -6.96197400  | -0.33982000 | -2.67206500 |
| H | -7.22307400  | -0.19171800 | 1.61238700  |
| O | -8.43092500  | -0.93466400 | -0.71901100 |
| C | -9.13250200  | -1.31702200 | 0.44221100  |
| H | -9.41618900  | -0.44668800 | 1.04603700  |
| H | -10.03338000 | -1.82681600 | 0.10109200  |
| H | -8.53582700  | -2.00072200 | 1.05921000  |
| H | 1.83814900   | -0.22263600 | 0.87858500  |

#### TS3A

|   |            |             |             |
|---|------------|-------------|-------------|
| C | 2.60930200 | -1.63784700 | -0.81570300 |
| C | 2.17230900 | -2.82521500 | -0.40118500 |
| C | 1.81334400 | -0.39953800 | -0.60484000 |
| H | 1.20431800 | -2.90426700 | 0.08665000  |
| H | 2.72044800 | -3.75343800 | -0.51547600 |
| C | 1.73075900 | 0.56412400  | -1.70915800 |
| O | 1.88695500 | 0.31753400  | -2.89383800 |
| O | 1.35119000 | 1.77424400  | -1.26363600 |
| C | 0.94853800 | 2.75170000  | -2.22481000 |
| H | 1.83531500 | 3.22093100  | -2.66528100 |

|   |             |             |             |
|---|-------------|-------------|-------------|
| H | 0.40031400  | 2.24703200  | -3.02641200 |
| C | 0.09192900  | 3.75350200  | -1.49666800 |
| C | 0.24882300  | 5.12250700  | -1.69973800 |
| C | -0.89288000 | 3.29611700  | -0.61656300 |
| C | -0.58257700 | 6.02960900  | -1.04355900 |
| H | 1.02194300  | 5.48331000  | -2.37377600 |
| C | -1.72066400 | 4.19907200  | 0.03949800  |
| H | -0.99086100 | 2.22979400  | -0.43581200 |
| C | -1.56902700 | 5.56949200  | -0.17618600 |
| H | -0.45425000 | 7.09500100  | -1.20723900 |
| H | -2.48182500 | 3.82549700  | 0.71842700  |
| H | -2.21432100 | 6.27624000  | 0.33607300  |
| N | 3.96959000  | -1.62213500 | -1.53556500 |
| C | 5.00068100  | -2.36100800 | -0.71384000 |
| H | 4.63068900  | -3.36675900 | -0.53141500 |
| H | 5.89555500  | -2.44518800 | -1.33624800 |
| C | 5.31994000  | -1.64887200 | 0.60177200  |
| H | 4.42438600  | -1.13504800 | 0.99435100  |
| H | 6.06435600  | -0.86785800 | 0.42195000  |
| C | 4.53411000  | -0.25008700 | -1.79312500 |
| H | 4.00441900  | 0.19559900  | -2.62868600 |
| H | 4.42275000  | 0.35844500  | -0.89509600 |
| H | 5.58770400  | -0.38603900 | -2.04386600 |
| C | 3.78937800  | -2.30094600 | -2.86168000 |
| H | 3.50587300  | -3.33842400 | -2.69160900 |
| H | 2.99464500  | -1.76964300 | -3.38606900 |
| H | 4.73329300  | -2.24393300 | -3.40769900 |
| N | 5.86944100  | -2.61307100 | 1.54222900  |
| C | 4.80791900  | -3.33950600 | 2.22571100  |
| H | 5.24390100  | -4.10876500 | 2.86767500  |
| H | 4.18169200  | -2.67472100 | 2.84667000  |
| H | 4.14964500  | -3.83628900 | 1.50777700  |
| C | 6.73804900  | -1.96528200 | 2.51444900  |
| H | 6.20781600  | -1.21150800 | 3.12220000  |
| H | 7.15105900  | -2.71928400 | 3.18919400  |
| H | 7.56889500  | -1.47443500 | 2.00133500  |
| C | 1.70781100  | 0.14860100  | 0.84699400  |
| C | 0.28558300  | 0.37062900  | 1.30778100  |
| H | 2.17915700  | -0.60508000 | 1.49581800  |
| H | 0.15781300  | 1.06215000  | 2.13284000  |
| C | -0.82653300 | -0.15103600 | 0.75657100  |
| C | 2.57858300  | 1.39367300  | 1.00228100  |
| O | 3.76636700  | 1.40889200  | 0.73753100  |
| O | 1.92476200  | 2.46331800  | 1.43801700  |

|   |              |              |              |
|---|--------------|--------------|--------------|
| C | 2. 62837300  | 3. 71055600  | 1. 35192700  |
| C | 1. 68058200  | 4. 78890500  | 1. 82502100  |
| H | 2. 92180000  | 3. 85581900  | 0. 30594300  |
| H | 3. 53972900  | 3. 65234100  | 1. 95423000  |
| H | 2. 16140000  | 5. 76721000  | 1. 74652000  |
| H | 0. 77597900  | 4. 79170200  | 1. 21238900  |
| H | 1. 39848500  | 4. 62206600  | 2. 86734700  |
| C | -2. 15995400 | 0. 23107600  | 1. 30723400  |
| C | -3. 16830000 | 0. 66429700  | 0. 43663500  |
| C | -2. 42785900 | 0. 16552200  | 2. 67532800  |
| C | -4. 41442700 | 1. 03107000  | 0. 92849200  |
| H | -2. 96370900 | 0. 68106000  | -0. 63005800 |
| C | -3. 67950700 | 0. 52940100  | 3. 16795800  |
| H | -1. 65535800 | -0. 20063600 | 3. 34524700  |
| C | -4. 67443300 | 0. 96384000  | 2. 29772100  |
| H | -5. 19093400 | 1. 35600000  | 0. 24194700  |
| H | -3. 88025400 | 0. 46185000  | 4. 23288800  |
| H | -5. 65294300 | 1. 23698400  | 2. 68027300  |
| N | -0. 78828700 | -0. 90201600 | -0. 43525100 |
| S | -1. 34777000 | -2. 42454400 | -0. 40992000 |
| O | -0. 98527200 | -3. 02062600 | -1. 69606900 |
| O | -0. 93121500 | -3. 12360200 | 0. 81933900  |
| C | -3. 12562200 | -2. 34829300 | -0. 34239000 |
| C | -3. 78217500 | -2. 52853600 | 0. 87470800  |
| C | -3. 83027700 | -2. 00420900 | -1. 48649400 |
| C | -5. 15024200 | -2. 33623600 | 0. 94579600  |
| H | -3. 20346600 | -2. 79789600 | 1. 75159800  |
| C | -5. 20826300 | -1. 80999500 | -1. 42279100 |
| H | -3. 29607500 | -1. 88387500 | -2. 42408500 |
| C | -5. 86509000 | -1. 96495200 | -0. 19906600 |
| H | -5. 69227200 | -2. 44816200 | 1. 87826100  |
| H | -5. 75126700 | -1. 54160700 | -2. 32058900 |
| O | -7. 19965100 | -1. 77889500 | -0. 02139400 |
| C | -7. 95430000 | -1. 36386100 | -1. 13731700 |
| H | -7. 92678300 | -2. 10980700 | -1. 94084100 |
| H | -8. 97967100 | -1. 25012100 | -0. 78636900 |
| H | -7. 59436600 | -0. 40414500 | -1. 52822100 |
| H | 0. 62569400  | -0. 80540700 | -0. 72810100 |

### M3A

|   |              |             |             |
|---|--------------|-------------|-------------|
| C | 1. 36292600  | 2. 25016300 | 1. 22447700 |
| C | 0. 42075200  | 3. 00142300 | 1. 80907800 |
| C | 1. 38379500  | 0. 82033000 | 1. 13325600 |
| H | -0. 29525700 | 2. 49733100 | 2. 44891600 |

|   |             |             |             |
|---|-------------|-------------|-------------|
| H | 0.31387700  | 4.07549400  | 1.70413500  |
| C | 2.47143800  | 0.11905200  | 1.67536800  |
| O | 3.48495200  | 0.59695200  | 2.20296200  |
| O | 2.33925600  | -1.25346600 | 1.55772200  |
| C | 3.45944300  | -1.99846000 | 2.00222300  |
| H | 3.78693800  | -1.63149200 | 2.97924300  |
| H | 3.09135700  | -3.02389000 | 2.11133500  |
| C | 4.62294500  | -1.96361800 | 1.03550000  |
| C | 4.47138000  | -1.51122500 | -0.27489000 |
| C | 5.87126200  | -2.42475800 | 1.45599200  |
| C | 5.55842000  | -1.51788000 | -1.14738600 |
| H | 3.50351300  | -1.15170800 | -0.61371000 |
| C | 6.95377700  | -2.43658700 | 0.58318000  |
| H | 5.99769900  | -2.77043800 | 2.47946300  |
| C | 6.80080700  | -1.98040300 | -0.72433400 |
| H | 5.42870800  | -1.16134300 | -2.16501100 |
| H | 7.91959400  | -2.79514800 | 0.92577400  |
| H | 7.64557500  | -1.98497200 | -1.40586300 |
| N | 2.50168900  | 3.03594900  | 0.48083900  |
| C | 1.92465600  | 4.13080000  | -0.37659500 |
| H | 1.45755400  | 4.85358500  | 0.28998100  |
| H | 2.76518500  | 4.63279900  | -0.86293400 |
| C | 0.93603000  | 3.63613000  | -1.43148000 |
| H | 0.22546100  | 2.91140400  | -0.99267700 |
| H | 1.48434700  | 3.11525200  | -2.22275100 |
| C | 3.31827200  | 2.12962300  | -0.39637700 |
| H | 3.92702900  | 1.49258900  | 0.24278000  |
| H | 2.65442300  | 1.50749500  | -0.99688000 |
| H | 3.94754100  | 2.76866200  | -1.01889600 |
| C | 3.40296000  | 3.63540500  | 1.51433400  |
| H | 2.82452100  | 4.34465900  | 2.10591600  |
| H | 3.75904200  | 2.81309600  | 2.13688600  |
| H | 4.22634400  | 4.14305000  | 1.00653800  |
| N | 0.24843500  | 4.77340200  | -2.02235200 |
| C | -0.79954100 | 5.28433500  | -1.14044800 |
| H | -1.27658800 | 6.14347800  | -1.61864600 |
| H | -1.57170700 | 4.52612500  | -0.93017200 |
| H | -0.37923700 | 5.63575300  | -0.19390300 |
| C | -0.34774600 | 4.39174500  | -3.29752300 |
| H | -1.11606500 | 3.60769400  | -3.18203000 |
| H | -0.82124500 | 5.26647500  | -3.75053900 |
| H | 0.42940300  | 4.03342500  | -3.97813100 |
| C | 0.20169200  | 0.13772800  | 0.47242700  |
| C | -0.85819200 | -0.38480600 | 1.40013900  |

|   |             |             |             |
|---|-------------|-------------|-------------|
| H | -0.24923300 | 0.88114900  | -0.19576800 |
| H | -0.58287400 | -1.23669300 | 2.01403700  |
| C | -2.08581900 | 0.14498200  | 1.52809100  |
| C | 0.69703500  | -0.90983800 | -0.52063500 |
| O | 1.43944300  | -0.64256800 | -1.44258300 |
| O | 0.21023300  | -2.12957000 | -0.29970600 |
| C | 0.73497900  | -3.16855000 | -1.13675900 |
| C | 0.01651600  | -4.43939300 | -0.74401100 |
| H | 1.81704900  | -3.22976400 | -0.97608100 |
| H | 0.55938500  | -2.90962800 | -2.18417000 |
| H | 0.30364000  | -5.25988900 | -1.40628700 |
| H | 0.25238200  | -4.71736600 | 0.28592500  |
| H | -1.06431200 | -4.28596800 | -0.81670400 |
| C | -3.16892700 | -0.46522700 | 2.33201000  |
| C | -4.18913000 | 0.32142700  | 2.87677300  |
| C | -3.19640300 | -1.85079900 | 2.53622500  |
| C | -5.19022000 | -0.26155600 | 3.64534200  |
| H | -4.19288700 | 1.38768100  | 2.67943100  |
| C | -4.19498300 | -2.42939900 | 3.31060600  |
| H | -2.44274500 | -2.47189400 | 2.05964800  |
| C | -5.19270000 | -1.63545900 | 3.87202500  |
| H | -5.97456600 | 0.36018500  | 4.06492500  |
| H | -4.20411900 | -3.50406400 | 3.46333700  |
| H | -5.97734400 | -2.08854900 | 4.46967700  |
| N | -2.41714400 | 1.37941500  | 0.87804100  |
| S | -3.36397800 | 1.35648800  | -0.51405000 |
| O | -4.75227200 | 1.19671400  | -0.12482800 |
| O | -2.91105800 | 2.52592500  | -1.26447100 |
| C | -2.89047100 | -0.10433600 | -1.40151500 |
| C | -1.82451600 | -0.05234200 | -2.30100400 |
| C | -3.56511500 | -1.29296100 | -1.15326300 |
| C | -1.43900100 | -1.20462800 | -2.96143400 |
| H | -1.31479300 | 0.88922400  | -2.48507200 |
| C | -3.18304100 | -2.45365300 | -1.81990900 |
| H | -4.39001500 | -1.30338800 | -0.44718700 |
| C | -2.11849600 | -2.40730700 | -2.72442400 |
| H | -0.61157500 | -1.20253800 | -3.66229700 |
| H | -3.71469100 | -3.37761200 | -1.62779800 |
| O | -1.66108600 | -3.48032000 | -3.41463500 |
| C | -2.42837300 | -4.66836100 | -3.37806400 |
| H | -3.45795900 | -4.48057200 | -3.70304800 |
| H | -1.94693200 | -5.35914100 | -4.06916000 |
| H | -2.43858900 | -5.11149400 | -2.37580100 |
| H | -1.61925400 | 1.98685500  | 0.70502700  |

## TS4A

|   |             |             |             |
|---|-------------|-------------|-------------|
| C | 1.28113400  | -2.06500000 | -1.00438000 |
| C | 0.04960100  | -2.72715000 | -1.36466300 |
| C | 1.38647100  | -0.70015600 | -0.98847000 |
| H | -0.17484100 | -2.52624500 | -2.41687600 |
| H | -0.06657300 | -3.78085600 | -1.13186200 |
| C | 2.55833300  | 0.01530600  | -1.51316800 |
| O | 3.52464100  | -0.49284700 | -2.05780600 |
| O | 2.41079200  | 1.35151400  | -1.44203100 |
| C | 3.51326300  | 2.11946500  | -1.93055800 |
| H | 3.77875200  | 1.77883100  | -2.93512500 |
| H | 3.12224800  | 3.13852100  | -1.98664400 |
| C | 4.71236700  | 2.04366700  | -1.01488600 |
| C | 4.55612200  | 1.82531700  | 0.35491800  |
| C | 5.99016100  | 2.22496400  | -1.54214600 |
| C | 5.67593500  | 1.79087600  | 1.18295800  |
| H | 3.56271400  | 1.67430500  | 0.77166000  |
| C | 7.10551700  | 2.19984500  | -0.71063000 |
| H | 6.11448400  | 2.37878400  | -2.61118300 |
| C | 6.95065600  | 1.98066200  | 0.65564500  |
| H | 5.54815300  | 1.61950800  | 2.24738400  |
| H | 8.09583300  | 2.34062000  | -1.13209300 |
| H | 7.81992600  | 1.95595700  | 1.30494900  |
| N | 2.47092300  | -2.94455100 | -0.58996400 |
| C | 1.94299800  | -4.08534500 | 0.26870900  |
| H | 1.38642000  | -4.74910200 | -0.38748100 |
| H | 2.82155800  | -4.63007600 | 0.62005700  |
| C | 1.09702200  | -3.62562900 | 1.45587600  |
| H | 0.29767400  | -2.93265600 | 1.13962100  |
| H | 1.74055100  | -3.09154900 | 2.16385600  |
| C | 3.49282400  | -2.20933800 | 0.24040100  |
| H | 4.14249800  | -1.63530700 | -0.41139900 |
| H | 2.96698900  | -1.53689000 | 0.91912900  |
| H | 4.06633500  | -2.95307700 | 0.79325800  |
| C | 3.12006500  | -3.53373900 | -1.80559600 |
| H | 2.35047500  | -4.05642000 | -2.37424200 |
| H | 3.54359100  | -2.71454000 | -2.38396300 |
| H | 3.89294000  | -4.23236000 | -1.47850300 |
| N | 0.55228700  | -4.79446300 | 2.13257800  |
| C | -0.55229500 | -5.38330400 | 1.36834500  |
| H | -0.95812500 | -6.22424000 | 1.93627800  |
| H | -1.35687100 | -4.65695800 | 1.17539400  |
| H | -0.19526800 | -5.78985400 | 0.41688600  |



|   |             |             |             |
|---|-------------|-------------|-------------|
| C | 0.05275000  | -4.39554800 | 3.44620200  |
| H | -0.75785800 | -3.65136300 | 3.37216200  |
| H | -0.33265800 | -5.27584300 | 3.96669600  |
| H | 0.86979700  | -3.97784600 | 4.04175900  |
| C | 0.16099800  | 0.07759200  | -0.51628700 |
| C | -0.88774500 | 0.46685500  | -1.51436000 |
| H | -0.32853500 | -0.59978700 | 0.18897200  |
| H | -0.69396200 | 1.30483200  | -2.17533800 |
| C | -2.07357200 | -0.18453900 | -1.53830800 |
| C | 0.63410600  | 1.18508800  | 0.41697500  |
| O | 1.44714700  | 0.99514800  | 1.29846500  |
| O | 0.03587800  | 2.35116800  | 0.19859000  |
| C | 0.42985100  | 3.42530600  | 1.06524200  |
| C | -0.40673800 | 4.62315600  | 0.67674500  |
| H | 1.50341300  | 3.60297100  | 0.93632200  |
| H | 0.25525400  | 3.12835100  | 2.10232500  |
| H | -0.23114100 | 5.44774000  | 1.37199500  |
| H | -0.16857800 | 4.95634900  | -0.33619100 |
| H | -1.46582200 | 4.35345000  | 0.70789100  |
| C | -3.22482200 | 0.28742200  | -2.35071300 |
| C | -4.21425500 | -0.61188600 | -2.76092200 |
| C | -3.36100400 | 1.64202600  | -2.68002000 |
| C | -5.29006500 | -0.17166300 | -3.52440900 |
| H | -4.13171800 | -1.64882600 | -2.45398200 |
| C | -4.43557000 | 2.07912600  | -3.44554700 |
| H | -2.63498100 | 2.35544200  | -2.30020500 |
| C | -5.40051700 | 1.17103900  | -3.87692500 |
| H | -6.05040900 | -0.87956000 | -3.83926400 |
| H | -4.53063400 | 3.13240000  | -3.69168200 |
| H | -6.24451100 | 1.51180000  | -4.46867900 |
| N | -2.19354000 | -1.38960500 | -0.82518600 |
| S | -3.06930300 | -1.52105600 | 0.51730100  |
| O | -4.50761400 | -1.60716100 | 0.27084600  |
| O | -2.43375400 | -2.58993300 | 1.30725500  |
| C | -2.81401300 | 0.01015400  | 1.40814000  |
| C | -1.78333500 | 0.11391000  | 2.34151600  |
| C | -3.60707900 | 1.10892000  | 1.10434500  |
| C | -1.54618500 | 1.32586700  | 2.96977400  |
| H | -1.18546100 | -0.76212200 | 2.57672800  |
| C | -3.37436400 | 2.33137000  | 1.73137000  |
| H | -4.41003000 | 1.00190300  | 0.38053800  |
| C | -2.33884100 | 2.43788000  | 2.66203100  |
| H | -0.75630500 | 1.43839700  | 3.70479500  |
| H | -3.99808800 | 3.18338000  | 1.48806300  |

|   |             |             |             |
|---|-------------|-------------|-------------|
| O | -2.01216900 | 3.58975300  | 3.31164200  |
| C | -2.92609600 | 4.66416900  | 3.23632000  |
| H | -3.92648500 | 4.35387100  | 3.55920600  |
| H | -2.54682500 | 5.43224800  | 3.91007000  |
| H | -2.98733400 | 5.07616100  | 2.22203100  |
| H | -1.00688100 | -2.14436900 | -0.91893800 |

M4A

|   |            |             |             |
|---|------------|-------------|-------------|
| C | 1.62821600 | 0.47562900  | 1.62324200  |
| C | 0.74152800 | 1.53201800  | 2.22515400  |
| C | 1.17116100 | -0.48389200 | 0.80577300  |
| H | 1.01118400 | 1.71156200  | 3.27092000  |
| H | 0.78287400 | 2.49087600  | 1.69891400  |
| C | 1.84648300 | -1.79086700 | 0.54386200  |
| O | 2.47694500 | -2.41953100 | 1.36700900  |
| O | 1.62710600 | -2.22788300 | -0.69930200 |
| C | 2.42350400 | -3.35434800 | -1.09851200 |
| H | 2.33916800 | -4.14933500 | -0.35446900 |
| H | 1.97661100 | -3.68042200 | -2.03929700 |
| C | 3.85548200 | -2.91214200 | -1.27764200 |
| C | 4.12119300 | -1.71803400 | -1.95515100 |
| C | 4.90924600 | -3.65572700 | -0.75206800 |
| C | 5.43406100 | -1.28228100 | -2.10867300 |
| H | 3.29297900 | -1.11963700 | -2.33128000 |
| C | 6.22353100 | -3.22158700 | -0.91260200 |
| H | 4.69911900 | -4.57020100 | -0.20424200 |
| C | 6.48747400 | -2.03464300 | -1.59011900 |
| H | 5.63579200 | -0.35600800 | -2.63787900 |
| H | 7.03939400 | -3.80604500 | -0.49955800 |
| H | 7.51091300 | -1.69518700 | -1.71389300 |
| N | 3.09069200 | 0.55407400  | 2.04112500  |
| C | 3.49393200 | 2.01531100  | 2.15829400  |
| H | 2.85043100 | 2.48206400  | 2.89920500  |
| H | 4.51330000 | 2.01677600  | 2.55012200  |
| C | 3.44188300 | 2.75958500  | 0.82280300  |
| H | 2.52296300 | 2.50882100  | 0.26007000  |
| H | 4.28345200 | 2.43741200  | 0.20267300  |
| C | 4.05539800 | -0.05114800 | 1.04619200  |
| H | 4.14275600 | -1.11978100 | 1.20722600  |
| H | 3.68165700 | 0.15104000  | 0.04139300  |
| H | 5.02530800 | 0.42341700  | 1.19641600  |
| C | 3.26024700 | -0.11417000 | 3.37490500  |
| H | 2.60691400 | 0.37684700  | 4.09614500  |
| H | 2.98240600 | -1.16013100 | 3.25072900  |

|   |             |             |             |
|---|-------------|-------------|-------------|
| H | 4.30335800  | -0.01406000 | 3.68060500  |
| N | 3.59436300  | 4.18330900  | 1.07540200  |
| C | 2.34790500  | 4.80387600  | 1.50672100  |
| H | 2.52547900  | 5.86243000  | 1.70957000  |
| H | 1.55326600  | 4.72351700  | 0.74383900  |
| H | 1.97864000  | 4.35286700  | 2.43144600  |
| C | 4.10765300  | 4.86806900  | -0.10368200 |
| H | 3.42528500  | 4.79497100  | -0.96787900 |
| H | 4.25347100  | 5.92568500  | 0.12867800  |
| H | 5.07510800  | 4.44562800  | -0.38772000 |
| C | -0.13358800 | -0.29954300 | 0.05721500  |
| C | -1.16969300 | -1.36597300 | 0.25192900  |
| H | -0.58953300 | 0.62934800  | 0.40777100  |
| H | -1.13177600 | -2.26518100 | -0.35182500 |
| C | -2.14428700 | -1.14987500 | 1.16859100  |
| C | 0.24390200  | 0.02609900  | -1.38327600 |
| O | 1.27841100  | 0.57776400  | -1.70740300 |
| O | -0.72526400 | -0.29232600 | -2.23094700 |
| C | -0.56291100 | 0.14322500  | -3.58907600 |
| C | -1.66624900 | -0.51720200 | -4.38397000 |
| H | 0.43550600  | -0.13543700 | -3.93844000 |
| H | -0.64828200 | 1.23395900  | -3.61423300 |
| H | -1.68883800 | -0.12166600 | -5.40250200 |
| H | -1.52238400 | -1.59940700 | -4.42665800 |
| H | -2.62652500 | -0.31672500 | -3.90293900 |
| C | -3.28510100 | -2.10121500 | 1.29261600  |
| C | -3.90481100 | -2.29365500 | 2.53126800  |
| C | -3.75508000 | -2.81266500 | 0.18302700  |
| C | -4.94303000 | -3.20790600 | 2.66357900  |
| H | -3.56782400 | -1.70011500 | 3.37401900  |
| C | -4.79602900 | -3.72614800 | 0.31558500  |
| H | -3.31646400 | -2.61851400 | -0.79211800 |
| C | -5.38781100 | -3.93218900 | 1.55937000  |
| H | -5.41480100 | -3.34905700 | 3.63111000  |
| H | -5.15457900 | -4.26776000 | -0.55486900 |
| H | -6.20292600 | -4.64178800 | 1.66435000  |
| N | -2.02330200 | -0.06151500 | 2.02752100  |
| S | -3.13340300 | 1.08404100  | 1.98380900  |
| O | -4.49806100 | 0.67373500  | 2.33237100  |
| O | -2.56638500 | 2.24737400  | 2.68169400  |
| C | -3.21502200 | 1.54113000  | 0.24177300  |
| C | -2.27658300 | 2.43164000  | -0.28177400 |
| C | -4.12373300 | 0.91504300  | -0.59929700 |
| C | -2.23979100 | 2.68396700  | -1.64426500 |

|   |             |            |             |
|---|-------------|------------|-------------|
| H | -1.59687500 | 2.93497800 | 0.40159900  |
| C | -4.10730200 | 1.17437600 | -1.97095400 |
| H | -4.85126400 | 0.23086700 | -0.17189100 |
| C | -3.15676000 | 2.05223100 | -2.49181600 |
| H | -1.53172000 | 3.38295400 | -2.07828200 |
| H | -4.82941600 | 0.68733000 | -2.61676600 |
| O | -3.03698300 | 2.34989100 | -3.82099600 |
| C | -4.12714100 | 2.02393800 | -4.65676700 |
| H | -5.06341100 | 2.43357300 | -4.26045100 |
| H | -3.91319100 | 2.47255300 | -5.62719400 |
| H | -4.23717300 | 0.93998800 | -4.78287600 |
| H | -0.29159800 | 1.16351000 | 2.24824400  |

TS5A

|   |             |             |             |
|---|-------------|-------------|-------------|
| C | 0.14418600  | -1.95335800 | 0.66312100  |
| C | 0.54284900  | -2.08648500 | 2.11744200  |
| C | -1.15632700 | -1.59681700 | 0.29167200  |
| H | 0.03111500  | -1.29474100 | 2.66375800  |
| H | 0.22299700  | -3.02824600 | 2.56827600  |
| C | -2.19674200 | -1.61360300 | 1.29310100  |
| O | -2.22300000 | -2.26144500 | 2.32856300  |
| O | -3.26964800 | -0.85565800 | 0.91624700  |
| C | -4.43525900 | -0.99109600 | 1.72464200  |
| H | -4.71950400 | -2.04572400 | 1.79279900  |
| H | -4.21177100 | -0.64363200 | 2.73930900  |
| C | -5.51355600 | -0.16573400 | 1.07727500  |
| C | -6.69286600 | -0.75016600 | 0.62102200  |
| C | -5.32069000 | 1.20756400  | 0.90098700  |
| C | -7.67089500 | 0.02330000  | -0.00355600 |
| H | -6.84206600 | -1.81930300 | 0.74484000  |
| C | -6.29594700 | 1.98184200  | 0.28414800  |
| H | -4.39457500 | 1.66013300  | 1.24521400  |
| C | -7.47297300 | 1.38946600  | -0.17477200 |
| H | -8.58396200 | -0.44349400 | -0.35938000 |
| H | -6.13983600 | 3.04885600  | 0.15644700  |
| H | -8.23255300 | 1.99352000  | -0.66106200 |
| N | 0.78640900  | -3.11723200 | -0.19656700 |
| C | 2.16965700  | -3.50384100 | 0.29745600  |
| H | 2.67745900  | -2.60782900 | 0.63251400  |
| H | 2.02177600  | -4.14705500 | 1.16692200  |
| C | 3.05238700  | -4.23575200 | -0.70823300 |
| H | 3.25241500  | -3.59587100 | -1.58267500 |
| H | 2.55525200  | -5.15063600 | -1.05554300 |
| C | 0.74058500  | -2.86491200 | -1.67277000 |

|   |             |             |             |
|---|-------------|-------------|-------------|
| H | -0.30269500 | -2.70852500 | -1.94177500 |
| H | 1.37206100  | -2.01250800 | -1.91198200 |
| H | 1.09816100  | -3.76317300 | -2.17521500 |
| C | -0.12024100 | -4.29690700 | 0.04033400  |
| H | -0.26173800 | -4.43569900 | 1.11071900  |
| H | -1.08139900 | -4.08883400 | -0.42518600 |
| H | 0.35585000  | -5.17614900 | -0.39745500 |
| N | 4.28360300  | -4.62289000 | -0.03275000 |
| C | 5.18900200  | -3.48558300 | 0.11994500  |
| H | 6.07820800  | -3.81496900 | 0.66406100  |
| H | 5.50114300  | -3.07189800 | -0.85445300 |
| H | 4.72458200  | -2.67600600 | 0.68726400  |
| C | 4.95084400  | -5.69122000 | -0.75882900 |
| H | 5.23649800  | -5.39720500 | -1.78520400 |
| H | 5.85981300  | -5.97793800 | -0.22380200 |
| H | 4.29988500  | -6.56831900 | -0.81777600 |
| C | -1.32569400 | -0.62294800 | -0.88151900 |
| C | -0.94834400 | 0.67027100  | -0.23818600 |
| H | -0.57827900 | -0.83272200 | -1.64821700 |
| H | -1.70569900 | 1.39403600  | 0.04175200  |
| C | 0.31309500  | 0.74522800  | 0.25095400  |
| C | -2.65747400 | -0.75575000 | -1.58292000 |
| O | -3.07293500 | -1.81504700 | -1.99344400 |
| O | -3.27187500 | 0.41623400  | -1.77075500 |
| C | -4.55045400 | 0.36051100  | -2.42130900 |
| C | -4.87378800 | 1.75952700  | -2.89709400 |
| H | -5.28583600 | -0.00449900 | -1.69618700 |
| H | -4.49774600 | -0.35495200 | -3.24589300 |
| H | -5.87358600 | 1.78130800  | -3.33844000 |
| H | -4.85229300 | 2.45946200  | -2.05922000 |
| H | -4.15130200 | 2.09031400  | -3.64736100 |
| C | 0.71689900  | 1.86056200  | 1.14700600  |
| C | 1.35026000  | 1.61858500  | 2.37160400  |
| C | 0.45701600  | 3.18054100  | 0.76617400  |
| C | 1.71389500  | 2.67913500  | 3.19487000  |
| H | 1.57746000  | 0.59805600  | 2.66366200  |
| C | 0.82117400  | 4.23953200  | 1.59216200  |
| H | -0.00486500 | 3.36625700  | -0.19926300 |
| C | 1.45415500  | 3.99244100  | 2.80788200  |
| H | 2.20205200  | 2.47852100  | 4.14362500  |
| H | 0.62041300  | 5.26000000  | 1.27907500  |
| H | 1.74285300  | 4.81813300  | 3.45082900  |
| N | 1.11986400  | -0.38387600 | 0.02259300  |
| S | 2.76108900  | -0.24508500 | -0.06841700 |

|   |            |             |             |
|---|------------|-------------|-------------|
| O | 3.41468300 | -0.49490000 | 1.22588200  |
| O | 3.19545500 | -1.11711000 | -1.17160800 |
| C | 3.09049900 | 1.42784900  | -0.54981500 |
| C | 2.62384300 | 1.89013100  | -1.78118600 |
| C | 3.76429800 | 2.26210700  | 0.32783100  |
| C | 2.81894700 | 3.21547100  | -2.11911200 |
| H | 2.10098600 | 1.21508800  | -2.45188400 |
| C | 3.96669500 | 3.59650400  | -0.01081100 |
| H | 4.09903500 | 1.87072600  | 1.28236000  |
| C | 3.48002000 | 4.07585500  | -1.22938800 |
| H | 2.46499600 | 3.62095600  | -3.06015400 |
| H | 4.47734100 | 4.24811900  | 0.68666300  |
| O | 3.59485700 | 5.35979400  | -1.64143600 |
| C | 4.20498700 | 6.27962000  | -0.75979900 |
| H | 5.24755800 | 6.00803800  | -0.55784900 |
| H | 4.17396400 | 7.24579700  | -1.26199600 |
| H | 3.65702900 | 6.34134800  | 0.18800200  |
| H | 1.61768800 | -1.95557000 | 2.24202800  |

#### M5A

|   |             |             |             |
|---|-------------|-------------|-------------|
| C | 0.06535900  | -0.55543300 | 1.64206000  |
| C | 0.01500200  | -1.46160800 | 2.84405800  |
| C | -0.98213100 | -0.15046700 | 0.89353100  |
| H | 0.94940600  | -1.39610900 | 3.40344300  |
| H | -0.81831800 | -1.18513800 | 3.48997100  |
| C | -2.34829600 | -0.57420300 | 1.27634000  |
| O | -2.62750400 | -1.49538100 | 2.01476500  |
| O | -3.29593000 | 0.21116000  | 0.73258900  |
| C | -4.64759900 | -0.09946300 | 1.10268000  |
| H | -4.88973400 | -1.11102600 | 0.76560300  |
| H | -4.72772300 | -0.07823100 | 2.19346500  |
| C | -5.52266500 | 0.93226400  | 0.45217000  |
| C | -6.00865100 | 0.73239800  | -0.84053800 |
| C | -5.79669500 | 2.13292100  | 1.10790900  |
| C | -6.75421100 | 1.72333700  | -1.47254600 |
| H | -5.78820300 | -0.19877400 | -1.35521000 |
| C | -6.54207400 | 3.12613700  | 0.47898800  |
| H | -5.41366500 | 2.29029300  | 2.11301600  |
| C | -7.01813000 | 2.92312000  | -0.81430000 |
| H | -7.12537400 | 1.56239300  | -2.47942500 |
| H | -6.74749100 | 4.05867600  | 0.99533200  |
| H | -7.59779400 | 3.69699900  | -1.30750900 |
| N | -1.76041500 | -2.21358900 | -1.22392800 |
| C | -1.06691600 | -3.20745200 | -0.41092700 |

|   |             |             |             |
|---|-------------|-------------|-------------|
| H | -0.02617700 | -2.87217500 | -0.30478300 |
| H | -1.51387600 | -3.19534000 | 0.59117200  |
| C | -1.11552500 | -4.64565700 | -0.94093200 |
| H | -0.48415100 | -4.74083600 | -1.84880700 |
| H | -2.14491400 | -4.87750600 | -1.24349700 |
| C | -1.22912400 | -2.08505000 | -2.56904700 |
| H | -1.63563500 | -1.17702300 | -3.02391500 |
| H | -0.13675800 | -1.99783100 | -2.52439900 |
| H | -1.46941700 | -2.94618800 | -3.21720800 |
| C | -3.20336400 | -2.36035800 | -1.24728600 |
| H | -3.55878100 | -2.54468600 | -0.22839800 |
| H | -3.64081200 | -1.42591600 | -1.61894300 |
| H | -3.55589800 | -3.18782200 | -1.88861200 |
| N | -0.72677300 | -5.61820100 | 0.07012400  |
| C | 0.65811900  | -5.44424800 | 0.47949700  |
| H | 0.91314600  | -6.20740000 | 1.22035900  |
| H | 1.36203000  | -5.54016900 | -0.37001500 |
| H | 0.81479300  | -4.46508700 | 0.93517500  |
| C | -0.93890900 | -6.96691900 | -0.41912700 |
| H | -0.32462500 | -7.20077500 | -1.30992400 |
| H | -0.68724600 | -7.68769000 | 0.36442400  |
| H | -1.99103700 | -7.10504700 | -0.68549100 |
| C | -0.68553400 | 0.64509000  | -0.37706000 |
| C | 0.42465500  | 1.62253400  | -0.08344700 |
| H | -0.35389600 | -0.09120100 | -1.12220200 |
| H | 0.36905300  | 2.64091300  | -0.44930800 |
| C | 1.44378800  | 1.24181100  | 0.69134600  |
| C | -1.86956900 | 1.33467900  | -1.04324900 |
| O | -2.45401100 | 0.90416900  | -2.00792800 |
| O | -2.13565700 | 2.51982200  | -0.48353000 |
| C | -3.23085900 | 3.24390900  | -1.06529700 |
| C | -3.43123800 | 4.49321000  | -0.23831200 |
| H | -4.11661200 | 2.60423700  | -1.06421000 |
| H | -2.98459500 | 3.47279500  | -2.10729100 |
| H | -4.27026900 | 5.06897000  | -0.63754500 |
| H | -3.65885600 | 4.22751600  | 0.79676400  |
| H | -2.53568300 | 5.11934800  | -0.25045600 |
| C | 2.61111300  | 2.09479900  | 1.00675200  |
| C | 3.17855700  | 2.09628400  | 2.28508500  |
| C | 3.16927800  | 2.89718600  | 0.00637600  |
| C | 4.28637400  | 2.89282500  | 2.55446100  |
| H | 2.75935900  | 1.45678200  | 3.05507900  |
| C | 4.27150800  | 3.69822500  | 0.28220400  |
| H | 2.75600000  | 2.85475400  | -0.99722800 |

|   |              |              |              |
|---|--------------|--------------|--------------|
| C | 4. 83584200  | 3. 69440700  | 1. 55600500  |
| H | 4. 72114100  | 2. 88739500  | 3. 54886400  |
| H | 4. 70045700  | 4. 31364400  | -0. 50282600 |
| H | 5. 70265300  | 4. 31147200  | 1. 77072200  |
| N | 1. 34975500  | -0. 02675500 | 1. 33221400  |
| S | 2. 66147200  | -1. 14045400 | 1. 31423700  |
| O | 3. 41865200  | -1. 02201400 | 2. 55003000  |
| O | 2. 07283700  | -2. 42217200 | 0. 95080200  |
| C | 3. 65627800  | -0. 54077900 | -0. 01332400 |
| C | 3. 14787200  | -0. 56543800 | -1. 31368300 |
| C | 4. 90641800  | -0. 01167700 | 0. 27079700  |
| C | 3. 90392500  | -0. 02972500 | -2. 33721800 |
| H | 2. 16744300  | -0. 99303300 | -1. 50654700 |
| C | 5. 67368000  | 0. 51989200  | -0. 75967700 |
| H | 5. 25631900  | 0. 00826800  | 1. 29745300  |
| C | 5. 16515100  | 0. 52351800  | -2. 06186300 |
| H | 3. 54968300  | -0. 01828400 | -3. 36154400 |
| H | 6. 64365100  | 0. 94407300  | -0. 53431600 |
| O | 5. 81411700  | 1. 04068300  | -3. 12690200 |
| C | 7. 06848300  | 1. 65344800  | -2. 90072800 |
| H | 7. 79892400  | 0. 93277200  | -2. 51639800 |
| H | 7. 40145700  | 2. 02588300  | -3. 86823200 |
| H | 6. 97756600  | 2. 48893200  | -2. 19687800 |
| H | -0. 14655800 | -2. 49696600 | 2. 53481900  |

#### TS6A

|   |              |              |              |
|---|--------------|--------------|--------------|
| C | 0. 31500200  | -1. 54590300 | -1. 11711000 |
| C | 0. 21301700  | -2. 70104000 | -2. 07258400 |
| C | -0. 69433700 | -0. 80697800 | -0. 60812600 |
| H | 0. 84934400  | -3. 50958100 | -1. 70065500 |
| H | -0. 80802400 | -3. 06473000 | -2. 15514700 |
| C | -2. 08413200 | -0. 93501200 | -1. 13902100 |
| O | -2. 68535600 | 0. 01799300  | -1. 59290200 |
| O | -2. 59314600 | -2. 17191200 | -1. 10123000 |
| C | -3. 86455700 | -2. 36056000 | -1. 75126400 |
| H | -3. 94217200 | -1. 65739900 | -2. 58291900 |
| H | -3. 82841000 | -3. 38221400 | -2. 13492000 |
| C | -5. 01851000 | -2. 19768000 | -0. 79673500 |
| C | -5. 62910700 | -3. 32412000 | -0. 24326800 |
| C | -5. 49519600 | -0. 92705400 | -0. 46023200 |
| C | -6. 69917800 | -3. 19140800 | 0. 63750800  |
| H | -5. 26120300 | -4. 31278900 | -0. 50515100 |
| C | -6. 56794700 | -0. 79504000 | 0. 41693100  |
| H | -5. 01207700 | -0. 05128400 | -0. 88696000 |



|   |             |             |             |
|---|-------------|-------------|-------------|
| C | -7.16986500 | -1.92431000 | 0.96884000  |
| H | -7.16411500 | -4.07515500 | 1.06242600  |
| H | -6.94037600 | 0.19359700  | 0.66976200  |
| H | -8.00539900 | -1.81598700 | 1.65316100  |
| C | -0.47103600 | 0.29927200  | 0.35508100  |
| C | 0.84691200  | 0.21902100  | 0.99248000  |
| H | -0.66154400 | 1.56786100  | -0.35816800 |
| H | 0.94581000  | 0.65915000  | 1.98165800  |
| C | 1.83835100  | -0.56033500 | 0.52258500  |
| C | -1.49684900 | 0.54421300  | 1.39557100  |
| O | -1.41231100 | 1.44069900  | 2.21846600  |
| O | -2.54953800 | -0.29957000 | 1.34138500  |
| C | -3.59357000 | -0.13687500 | 2.31170000  |
| C | -4.03959300 | -1.51709600 | 2.74568000  |
| H | -4.41268100 | 0.41141000  | 1.83097000  |
| H | -3.21340600 | 0.45917400  | 3.14368000  |
| H | -4.90164700 | -1.43955400 | 3.41365300  |
| H | -4.32509800 | -2.11581400 | 1.87802200  |
| H | -3.23084300 | -2.02879800 | 3.27290400  |
| C | 3.02812100  | -0.95025000 | 1.31049200  |
| C | 3.49295600  | -2.27302200 | 1.27015600  |
| C | 3.70732800  | -0.02811700 | 2.11274600  |
| C | 4.59644900  | -2.66031100 | 2.01903000  |
| H | 2.97778200  | -2.98786200 | 0.63538100  |
| C | 4.81790400  | -0.41554900 | 2.85812000  |
| H | 3.37819400  | 1.00729000  | 2.12414100  |
| C | 5.26752200  | -1.73278700 | 2.81598200  |
| H | 4.93454000  | -3.69170800 | 1.98344200  |
| H | 5.34036300  | 0.32007600  | 3.46275900  |
| H | 6.12976600  | -2.03548100 | 3.40281300  |
| N | 1.68572600  | -1.20622700 | -0.76448100 |
| S | 2.41188300  | -0.29483500 | -2.04516200 |
| O | 2.59227500  | -1.20200500 | -3.16944700 |
| O | 1.66907300  | 0.95220400  | -2.25542500 |
| C | 3.97796900  | 0.13025900  | -1.35510200 |
| C | 4.20879000  | 1.43610400  | -0.92585800 |
| C | 4.92081200  | -0.87046600 | -1.16050700 |
| C | 5.38835200  | 1.73232800  | -0.26970300 |
| H | 3.45795400  | 2.19738900  | -1.10388300 |
| C | 6.09974100  | -0.58229000 | -0.48575800 |
| H | 4.71741300  | -1.87847700 | -1.50835500 |
| C | 6.32038000  | 0.71647600  | -0.01603700 |
| H | 5.60514900  | 2.73129500  | 0.09143600  |
| H | 6.81654800  | -1.37308900 | -0.30719500 |

|   |             |             |             |
|---|-------------|-------------|-------------|
| O | 7.40616600  | 1.08846100  | 0.69584100  |
| C | 8.33029200  | 0.08009300  | 1.05593600  |
| H | 8.80555800  | -0.35802600 | 0.17071700  |
| H | 9.08773200  | 0.56932700  | 1.66710800  |
| H | 7.83841000  | -0.70934800 | 1.63575400  |
| H | 0.59237100  | -2.43114000 | -3.06112200 |
| N | -0.77022800 | 2.73132500  | -0.84643100 |
| C | -1.85925100 | 3.46145900  | -0.15595600 |
| H | -1.58227200 | 3.48147000  | 0.89982700  |
| H | -1.89287700 | 4.49139000  | -0.53973600 |
| C | -3.23568800 | 2.82862600  | -0.32070700 |
| H | -3.23948400 | 1.80182700  | 0.08786400  |
| H | -3.48115200 | 2.73933200  | -1.38397700 |
| C | -0.96351700 | 2.64722300  | -2.30716100 |
| H | -0.07160400 | 2.20088100  | -2.74522700 |
| H | -1.81526000 | 2.00166700  | -2.51593500 |
| H | -1.12830500 | 3.65172300  | -2.71620300 |
| C | 0.52333100  | 3.34784800  | -0.50839700 |
| H | 0.66442400  | 3.27876300  | 0.57353500  |
| H | 1.30783900  | 2.79026500  | -1.01931500 |
| H | 0.53682900  | 4.39911000  | -0.81803700 |
| N | -4.25729400 | 3.66442500  | 0.29863000  |
| C | -4.07691300 | 3.77295300  | 1.74120400  |
| H | -4.93120100 | 4.30584100  | 2.16683700  |
| H | -3.99164200 | 2.78776900  | 2.23193500  |
| H | -3.17924700 | 4.34608000  | 1.98189600  |
| C | -5.56972200 | 3.11753700  | 0.00647700  |
| H | -5.71026900 | 2.10867500  | 0.44157400  |
| H | -6.34427800 | 3.77417600  | 0.41214200  |
| H | -5.71188800 | 3.04336900  | -1.07540700 |

#### M6A

|   |             |             |            |
|---|-------------|-------------|------------|
| C | -0.55653600 | -1.25371600 | 1.53983000 |
| C | -0.46232200 | -1.90326000 | 2.88916900 |
| C | 0.47465400  | -0.91415700 | 0.72357000 |
| H | -1.17645400 | -2.73220700 | 2.92886200 |
| H | 0.53613700  | -2.30112300 | 3.07230100 |
| C | 1.85234200  | -0.88786400 | 1.29539500 |
| O | 2.42010600  | 0.15755200  | 1.55636300 |
| O | 2.37934300  | -2.08933100 | 1.54694200 |
| C | 3.68839500  | -2.08912000 | 2.13344700 |
| H | 3.75923900  | -1.28614800 | 2.87051500 |
| H | 3.75736500  | -3.05537600 | 2.63819400 |
| C | 4.77124900  | -1.95945300 | 1.09217900 |

|   |              |              |              |
|---|--------------|--------------|--------------|
| C | 4. 90937400  | -2. 93658600 | 0. 10274300  |
| C | 5. 67450400  | -0. 89902400 | 1. 13252500  |
| C | 5. 94683000  | -2. 86306000 | -0. 82086200 |
| H | 4. 19656000  | -3. 75619900 | 0. 06192400  |
| C | 6. 72110300  | -0. 82825000 | 0. 21388400  |
| H | 5. 55533700  | -0. 12760200 | 1. 88951100  |
| C | 6. 85961500  | -1. 81049200 | -0. 76297700 |
| H | 6. 04593600  | -3. 62740200 | -1. 58529700 |
| H | 7. 43224700  | -0. 00924300 | 0. 26252800  |
| H | 7. 67563400  | -1. 75706800 | -1. 47658200 |
| C | 0. 26027600  | -0. 41149400 | -0. 62049200 |
| C | -1. 07512500 | -0. 55217400 | -1. 11335800 |
| H | 1. 24093200  | 1. 44135100  | 0. 19485100  |
| H | -1. 20858700 | -0. 55237500 | -2. 19217600 |
| C | -2. 10556200 | -0. 91178400 | -0. 30593800 |
| C | 1. 29178200  | -0. 25105100 | -1. 60041500 |
| O | 1. 14487000  | 0. 20730400  | -2. 73516500 |
| O | 2. 54348800  | -0. 60758300 | -1. 15701100 |
| C | 3. 57815600  | -0. 62870900 | -2. 13882700 |
| C | 3. 46556700  | -1. 85122800 | -3. 03098500 |
| H | 4. 50711000  | -0. 63995800 | -1. 56249000 |
| H | 3. 53259600  | 0. 28435500  | -2. 74188600 |
| H | 4. 32941300  | -1. 91062100 | -3. 69981800 |
| H | 3. 43546500  | -2. 75748900 | -2. 42105700 |
| H | 2. 55583000  | -1. 79251400 | -3. 63134700 |
| C | -3. 40526800 | -1. 42448200 | -0. 77228700 |
| C | -4. 07155900 | -2. 43664400 | -0. 06219300 |
| C | -4. 02061200 | -0. 90881500 | -1. 92070800 |
| C | -5. 29917600 | -2. 92105600 | -0. 49491700 |
| H | -3. 61018900 | -2. 82771700 | 0. 83979300  |
| C | -5. 25351600 | -1. 39039300 | -2. 34976000 |
| H | -3. 53932900 | -0. 09762300 | -2. 45982000 |
| C | -5. 90074400 | -2. 39999600 | -1. 64082200 |
| H | -5. 79038000 | -3. 71299800 | 0. 06323200  |
| H | -5. 71623500 | -0. 96275300 | -3. 23469600 |
| H | -6. 85911700 | -2. 78141300 | -1. 98084600 |
| N | -1. 90122600 | -0. 89314700 | 1. 13138300  |
| S | -2. 31410200 | 0. 63508600  | 1. 84067900  |
| O | -2. 48788800 | 0. 40989600  | 3. 27036600  |
| O | -1. 37377100 | 1. 68931000  | 1. 42258400  |
| C | -3. 86551900 | 0. 97920600  | 1. 07543900  |
| C | -3. 94023300 | 1. 91519100  | 0. 04494900  |
| C | -4. 96279500 | 0. 20330100  | 1. 42372300  |
| C | -5. 12285000 | 2. 05616000  | -0. 65541000 |

|   |             |             |             |
|---|-------------|-------------|-------------|
| H | -3.06748100 | 2.50910600  | -0.20161100 |
| C | -6.15090600 | 0.33228800  | 0.71570900  |
| H | -4.87504500 | -0.52348100 | 2.22527700  |
| C | -6.21960100 | 1.23963900  | -0.34554400 |
| H | -5.22138400 | 2.76066300  | -1.47345700 |
| H | -6.99330900 | -0.29750800 | 0.97059000  |
| O | -7.30468600 | 1.39893800  | -1.13482600 |
| C | -8.39273800 | 0.51779600  | -0.93444300 |
| H | -8.84955500 | 0.66676400  | 0.05085600  |
| H | -9.12110700 | 0.75647900  | -1.70870500 |
| H | -8.07096300 | -0.52513900 | -1.03600700 |
| H | -0.73428900 | -1.21031700 | 3.69069000  |
| N | 1.35359500  | 2.44561300  | -0.03668000 |
| C | 2.65379000  | 2.63919200  | -0.75857600 |
| H | 2.56690100  | 2.05369400  | -1.67837600 |
| H | 2.70325300  | 3.70232200  | -1.01666300 |
| C | 3.90429300  | 2.27811200  | 0.04158000  |
| H | 4.04829000  | 1.18558400  | 0.05623000  |
| H | 3.78297500  | 2.59514300  | 1.08104200  |
| C | 1.26985400  | 3.19252100  | 1.24889200  |
| H | 0.23984000  | 3.14252700  | 1.59703300  |
| H | 1.91548200  | 2.70297500  | 1.97523100  |
| H | 1.58529300  | 4.22304400  | 1.07108000  |
| C | 0.22849100  | 2.80030500  | -0.95281100 |
| H | 0.33165600  | 2.20806900  | -1.86436400 |
| H | -0.69928700 | 2.55112500  | -0.44193400 |
| H | 0.29709300  | 3.86985700  | -1.16380700 |
| N | 5.04682000  | 3.00433700  | -0.50541000 |
| C | 5.50001300  | 2.42676100  | -1.76219000 |
| H | 6.31658800  | 3.03162400  | -2.16609500 |
| H | 5.85661100  | 1.38775800  | -1.64312700 |
| H | 4.69093700  | 2.42843000  | -2.49823700 |
| C | 6.13863800  | 3.04490500  | 0.45226900  |
| H | 6.50545900  | 2.03973100  | 0.72546500  |
| H | 6.97414800  | 3.60816800  | 0.02735400  |
| H | 5.81480100  | 3.55241000  | 1.36520500  |

TS7A

|   |             |             |            |
|---|-------------|-------------|------------|
| C | -0.52039700 | -1.47386100 | 1.48256800 |
| C | -0.35095200 | -1.97050100 | 2.88975100 |
| C | 0.49954500  | -1.05972300 | 0.66979600 |
| H | -0.97161500 | -2.85902800 | 3.03285800 |
| H | 0.68457200  | -2.22247800 | 3.11957300 |
| C | 1.87670000  | -0.98941800 | 1.23477500 |

|   |              |              |              |
|---|--------------|--------------|--------------|
| O | 2. 41713500  | 0. 06536900  | 1. 52316600  |
| O | 2. 44726800  | -2. 17620700 | 1. 44315200  |
| C | 3. 77137300  | -2. 14719700 | 1. 99643400  |
| H | 3. 83614100  | -1. 36353200 | 2. 75429100  |
| H | 3. 88554500  | -3. 12437000 | 2. 47050800  |
| C | 4. 81672600  | -1. 95219100 | 0. 92695600  |
| C | 4. 91825800  | -2. 87133900 | -0. 12080800 |
| C | 5. 72136000  | -0. 89447800 | 0. 99564200  |
| C | 5. 92429800  | -2. 74598700 | -1. 07298600 |
| H | 4. 20181500  | -3. 68620300 | -0. 18392300 |
| C | 6. 73564800  | -0. 77113100 | 0. 04603600  |
| H | 5. 63189700  | -0. 16713400 | 1. 79909900  |
| C | 6. 83996500  | -1. 69749400 | -0. 98777000 |
| H | 5. 99670400  | -3. 46678800 | -1. 88146400 |
| H | 7. 44874900  | 0. 04457500  | 0. 11627800  |
| H | 7. 63102300  | -1. 60391400 | -1. 72487100 |
| C | 0. 23731600  | -0. 55007900 | -0. 64629500 |
| C | -1. 10196800 | -0. 65626500 | -1. 09122700 |
| H | 1. 32548400  | 1. 34343300  | 0. 44089100  |
| H | -1. 29113900 | -0. 50549800 | -2. 15028600 |
| C | -2. 09362500 | -1. 12859800 | -0. 27064400 |
| C | 1. 24910700  | -0. 23111800 | -1. 62406100 |
| O | 1. 05452600  | 0. 32579800  | -2. 70122400 |
| O | 2. 51424200  | -0. 57131000 | -1. 23042500 |
| C | 3. 54119500  | -0. 44293300 | -2. 21607600 |
| C | 3. 47228100  | -1. 57093300 | -3. 22838500 |
| H | 4. 47453600  | -0. 47247100 | -1. 64805200 |
| H | 3. 44671900  | 0. 52606600  | -2. 71744700 |
| H | 4. 33064800  | -1. 52174900 | -3. 90474000 |
| H | 3. 49039400  | -2. 53476100 | -2. 71381100 |
| H | 2. 55500100  | -1. 49408600 | -3. 81505400 |
| C | -3. 43527800 | -1. 52173600 | -0. 74862400 |
| C | -4. 16366500 | -2. 50192700 | -0. 05466100 |
| C | -4. 01916500 | -0. 94443000 | -1. 88367900 |
| C | -5. 42174100 | -2. 89624700 | -0. 48978000 |
| H | -3. 72291900 | -2. 93792900 | 0. 83575100  |
| C | -5. 28150200 | -1. 33858900 | -2. 31677800 |
| H | -3. 49498700 | -0. 15378600 | -2. 41268300 |
| C | -5. 99053700 | -2. 31727300 | -1. 62417700 |
| H | -5. 96182500 | -3. 66367900 | 0. 05706100  |
| H | -5. 71903500 | -0. 86363800 | -3. 19067600 |
| H | -6. 97321100 | -2. 62892300 | -1. 96615100 |
| N | -1. 86393300 | -1. 31288500 | 1. 10795200  |
| S | -2. 42602400 | 0. 40043800  | 2. 07467400  |

|   |             |             |             |
|---|-------------|-------------|-------------|
| O | -2.84648500 | 0.10005600  | 3.45184900  |
| O | -1.34866300 | 1.40772000  | 1.86678700  |
| C | -3.84072000 | 0.95141400  | 1.15561700  |
| C | -3.70504100 | 1.88813000  | 0.13252400  |
| C | -5.04370800 | 0.28228000  | 1.35071300  |
| C | -4.77684200 | 2.14755800  | -0.70303900 |
| H | -2.76610000 | 2.41449600  | 0.01037600  |
| C | -6.12287800 | 0.53317400  | 0.51362900  |
| H | -5.12478400 | -0.45095700 | 2.14736400  |
| C | -5.97794500 | 1.44823200  | -0.53409600 |
| H | -4.70835700 | 2.86365800  | -1.51453700 |
| H | -7.04773400 | -0.00925000 | 0.66154200  |
| O | -6.94364500 | 1.71699100  | -1.44426600 |
| C | -8.14202400 | 0.97181300  | -1.36120100 |
| H | -8.67875800 | 1.18374600  | -0.42887000 |
| H | -8.75222400 | 1.28466900  | -2.20780100 |
| H | -7.93770500 | -0.10299500 | -1.42869700 |
| H | -0.70405700 | -1.22110900 | 3.60734200  |
| N | 1.31814700  | 2.35779800  | 0.23692600  |
| C | 2.55812000  | 2.68811100  | -0.53602200 |
| H | 2.44620600  | 2.17985200  | -1.49853500 |
| H | 2.54298800  | 3.77055000  | -0.70039500 |
| C | 3.86524700  | 2.31382400  | 0.16163400  |
| H | 4.05105100  | 1.23080700  | 0.06846600  |
| H | 3.78836900  | 2.52933400  | 1.23106500  |
| C | 1.23817300  | 3.02950500  | 1.56552200  |
| H | 0.24170300  | 2.84730400  | 1.96777200  |
| H | 1.97750500  | 2.58461400  | 2.22773600  |
| H | 1.42766500  | 4.09552300  | 1.42418100  |
| C | 0.11148800  | 2.66590100  | -0.58523700 |
| H | 0.20732600  | 2.16797500  | -1.55138000 |
| H | -0.74760800 | 2.28107000  | -0.03934200 |
| H | 0.05979000  | 3.75076900  | -0.70366500 |
| N | 4.95027000  | 3.12900900  | -0.37358500 |
| C | 5.34617900  | 2.68944000  | -1.70337500 |
| H | 6.12309500  | 3.35488800  | -2.08917100 |
| H | 5.73618800  | 1.65518500  | -1.70405100 |
| H | 4.49818600  | 2.73675200  | -2.39253400 |
| C | 6.09595300  | 3.11143200  | 0.52022700  |
| H | 6.51050100  | 2.09761000  | 0.66162700  |
| H | 6.88532000  | 3.74824700  | 0.11176500  |
| H | 5.81124900  | 3.50715700  | 1.49902300  |

P

|   |             |             |             |
|---|-------------|-------------|-------------|
| C | -1.20699400 | -1.06995000 | 1.89607200  |
| C | -0.80000700 | -0.73197500 | 3.30323500  |
| C | -0.27452600 | -1.22622300 | 0.85097400  |
| H | -1.70162000 | -0.52010800 | 3.87747700  |
| H | -0.25333400 | -1.55430500 | 3.76918300  |
| C | 1.20018400  | -1.06772200 | 1.03034800  |
| O | 1.92935900  | -0.54189800 | 0.21834900  |
| O | 1.65806300  | -1.59124700 | 2.17480400  |
| C | 3.07352700  | -1.44899400 | 2.36231000  |
| H | 3.34292000  | -0.39212200 | 2.27523100  |
| H | 3.24009400  | -1.78327700 | 3.38868400  |
| C | 3.86280000  | -2.27956800 | 1.37938000  |
| C | 3.49136100  | -3.59780300 | 1.11212400  |
| C | 4.97552300  | -1.73847500 | 0.73792100  |
| C | 4.23380500  | -4.36707200 | 0.22083600  |
| H | 2.61281100  | -4.01465100 | 1.59657200  |
| C | 5.71781100  | -2.50623300 | -0.15596300 |
| H | 5.25243600  | -0.70459300 | 0.93151500  |
| C | 5.34778200  | -3.82340000 | -0.41615900 |
| H | 3.94426100  | -5.39475000 | 0.02347100  |
| H | 6.58062100  | -2.07355800 | -0.65231700 |
| H | 5.92439000  | -4.42463500 | -1.11196500 |
| C | -0.76739500 | -1.40369600 | -0.44387500 |
| C | -2.13492700 | -1.43992800 | -0.66832300 |
| H | 1.54095900  | 3.03216900  | -0.90960100 |
| H | -2.50791000 | -1.57960100 | -1.67582200 |
| C | -2.99006200 | -1.33667300 | 0.43170100  |
| C | 0.16339200  | -1.54672200 | -1.61208000 |
| O | 0.08056900  | -0.87209300 | -2.60979700 |
| O | 1.04162200  | -2.53030900 | -1.40024400 |
| C | 2.21649500  | -2.57776100 | -2.22866300 |
| C | 2.38893200  | -3.98949200 | -2.74676100 |
| H | 3.04809600  | -2.27552400 | -1.58106300 |
| H | 2.10690800  | -1.85689400 | -3.04107400 |
| H | 3.33898500  | -4.07605700 | -3.28059100 |
| H | 2.39556800  | -4.69821900 | -1.91591900 |
| H | 1.57698100  | -4.25403600 | -3.42819500 |
| C | -4.46630800 | -1.45515700 | 0.29265700  |
| C | -5.23566800 | -1.79460200 | 1.41229700  |
| C | -5.10868500 | -1.26113600 | -0.93479000 |
| C | -6.61057700 | -1.96578300 | 1.29743200  |
| H | -4.73232700 | -1.92693300 | 2.36352400  |
| C | -6.48484700 | -1.42842800 | -1.04739800 |
| H | -4.54032400 | -0.93787000 | -1.80147500 |

|   |             |             |             |
|---|-------------|-------------|-------------|
| C | -7.23941000 | -1.79066700 | 0.06560400  |
| H | -7.19312400 | -2.24140700 | 2.17088400  |
| H | -6.96770200 | -1.26049300 | -2.00465100 |
| H | -8.31277800 | -1.92603700 | -0.02392700 |
| N | -2.51926000 | -1.15214000 | 1.67225400  |
| S | 0.11081300  | 1.78451100  | -0.01015800 |
| O | 0.26858900  | 1.74330300  | 1.48353300  |
| O | 0.59572000  | 3.22651900  | -0.56245400 |
| C | -1.64389700 | 1.96576500  | -0.28005300 |
| C | -2.13840600 | 1.89282500  | -1.58424100 |
| C | -2.50027600 | 1.98467000  | 0.80697000  |
| C | -3.50557700 | 1.86556800  | -1.79018700 |
| H | -1.45188200 | 1.83369700  | -2.42480600 |
| C | -3.87951500 | 1.95235100  | 0.60746600  |
| H | -2.07402800 | 1.99286000  | 1.80611200  |
| C | -4.38115100 | 1.88989400  | -0.69355400 |
| H | -3.93212700 | 1.80621600  | -2.78590400 |
| H | -4.54151400 | 1.94409400  | 1.46416800  |
| O | -5.69916700 | 1.81613600  | -0.99951400 |
| C | -6.60662000 | 1.71580400  | 0.07993000  |
| H | -6.60200600 | 2.63019100  | 0.68532400  |
| H | -7.59215800 | 1.57835900  | -0.36453400 |
| H | -6.37149200 | 0.85158300  | 0.71269600  |
| H | -0.15148400 | 0.14870600  | 3.29054100  |
| N | 2.91299500  | 2.44603800  | -1.61064600 |
| C | 3.87228300  | 1.84645600  | -0.66420700 |
| H | 3.76654600  | 0.75761000  | -0.70092500 |
| H | 4.90165400  | 2.08820200  | -0.97425700 |
| C | 3.59821800  | 2.27611000  | 0.77331900  |
| H | 4.35327100  | 1.80313700  | 1.43754800  |
| H | 2.62362300  | 1.87383800  | 1.06915900  |
| C | 3.44597000  | 3.65818200  | -2.23276600 |
| H | 2.68381300  | 4.09196400  | -2.88653500 |
| H | 3.68756800  | 4.37854300  | -1.45046400 |
| H | 4.34409900  | 3.44277900  | -2.83389000 |
| C | 2.48290900  | 1.48198200  | -2.62463900 |
| H | 2.03665900  | 0.61644100  | -2.13119600 |
| H | 1.72123500  | 1.94176200  | -3.26146600 |
| H | 3.32089700  | 1.15423200  | -3.26079500 |
| N | 3.56773800  | 3.72013700  | 0.94443800  |
| C | 4.90368600  | 4.27865700  | 1.02656700  |
| H | 4.84592000  | 5.36960700  | 1.08443500  |
| H | 5.45893400  | 3.91477100  | 1.91177900  |
| H | 5.48334600  | 4.01974400  | 0.13445400  |



|   |            |            |            |
|---|------------|------------|------------|
| C | 2.76961800 | 4.09902900 | 2.10135000 |
| H | 3.20614800 | 3.73222300 | 3.04922900 |
| H | 2.70703100 | 5.18974700 | 2.15690900 |
| H | 1.76199600 | 3.68987300 | 1.99625800 |

TS3B

|   |             |             |             |
|---|-------------|-------------|-------------|
| C | -0.56066900 | 1.06755100  | -0.77374200 |
| C | -1.18278100 | 0.89095500  | -1.98483500 |
| C | -1.10880200 | 0.15135700  | 0.34099500  |
| C | -2.62556200 | 0.23888800  | 0.43338700  |
| O | -3.23520100 | 1.04952600  | 1.09657300  |
| O | -3.21802800 | -0.72519600 | -0.27463000 |
| C | -4.64410400 | -0.75843000 | -0.23170400 |
| H | -4.98173300 | -0.53916200 | 0.78581200  |
| H | -5.02820000 | 0.03404400  | -0.88622000 |
| C | -5.10557900 | -2.11989900 | -0.68137000 |
| C | -6.34495500 | -2.59536500 | -0.25159000 |
| C | -4.32333100 | -2.91004900 | -1.52478400 |
| C | -6.80405400 | -3.84248200 | -0.66340200 |
| H | -6.95118600 | -1.98772800 | 0.41626200  |
| C | -4.78075400 | -4.16125600 | -1.92982300 |
| H | -3.35155400 | -2.54970700 | -1.84632700 |
| C | -6.02073700 | -4.62950600 | -1.50366400 |
| H | -7.76818400 | -4.20346700 | -0.31967700 |
| H | -4.16329600 | -4.77224300 | -2.58052800 |
| H | -6.37344700 | -5.60542300 | -1.82125700 |
| N | -0.37634700 | 2.73036300  | -0.46749400 |
| C | -1.75742600 | 3.25616500  | -0.19893100 |
| H | -2.40514200 | 2.67742600  | -0.85892400 |
| H | -2.00066300 | 3.00970100  | 0.83699400  |
| C | -1.95411500 | 4.75486700  | -0.42135200 |
| H | -2.05927300 | 4.96497700  | -1.50436800 |
| H | -1.09480000 | 5.33691500  | -0.06614100 |
| C | 0.17322700  | 3.30962600  | -1.73032400 |
| H | 1.03624000  | 2.71146600  | -2.02864900 |
| H | -0.59364600 | 3.27128300  | -2.49943100 |
| H | 0.46026300  | 4.34590000  | -1.54307400 |
| C | 0.51486400  | 3.17586300  | 0.63914700  |
| H | 0.19160900  | 2.74200500  | 1.58048600  |
| H | 1.54098900  | 2.89794900  | 0.42102300  |
| H | 0.44777200  | 4.26329700  | 0.71074200  |
| N | -3.11813100 | 5.21086600  | 0.32291700  |
| C | -4.32406100 | 4.48259400  | -0.05045300 |
| H | -5.17466500 | 4.90671600  | 0.48888200  |

|   |             |             |             |
|---|-------------|-------------|-------------|
| H | -4.53561600 | 4.54753200  | -1.13437900 |
| H | -4.24312600 | 3.42935200  | 0.23126600  |
| C | -3.30386400 | 6.63776400  | 0.12631900  |
| H | -3.50750200 | 6.90004700  | -0.92849200 |
| H | -4.14443800 | 6.98394100  | 0.73300800  |
| H | -2.40706300 | 7.17662400  | 0.44604000  |
| C | -0.50590800 | 0.27223800  | 1.74200300  |
| C | 0.99243400  | 0.33236700  | 1.75175600  |
| H | -0.91399900 | 1.17534800  | 2.22700400  |
| H | 1.45428300  | 0.33601500  | 2.73389900  |
| C | 1.75847700  | 0.49611900  | 0.66140700  |
| C | -0.93973400 | -0.85222900 | 2.68606100  |
| O | -0.44085100 | -1.03901000 | 3.76795300  |
| O | -1.93726300 | -1.58791300 | 2.18857000  |
| C | -2.42099400 | -2.65703300 | 3.01878300  |
| C | -3.64163300 | -3.22892300 | 2.33344600  |
| H | -2.64329000 | -2.25520300 | 4.01110400  |
| H | -1.62077500 | -3.39506400 | 3.12891600  |
| H | -3.40401300 | -3.54510900 | 1.31477900  |
| H | -4.01523000 | -4.09062000 | 2.89173400  |
| H | -4.43873600 | -2.48273100 | 2.27944000  |
| C | 3.22387600  | 0.74518300  | 0.83849200  |
| C | 3.97547100  | 0.01412000  | 1.76253900  |
| C | 3.86129600  | 1.74745900  | 0.09634500  |
| C | 5.32657600  | 0.28950000  | 1.95326700  |
| H | 3.50037600  | -0.79520200 | 2.30939000  |
| C | 5.20614500  | 2.03517600  | 0.30033500  |
| H | 3.29692100  | 2.27461200  | -0.66873300 |
| C | 5.94461700  | 1.30745700  | 1.23122100  |
| H | 5.89885600  | -0.30137800 | 2.66219700  |
| H | 5.68187600  | 2.82253700  | -0.27644500 |
| H | 6.99663200  | 1.52658900  | 1.38693900  |
| N | 1.20764400  | 0.71474700  | -0.62834700 |
| S | 1.52877600  | -0.44240900 | -1.81912800 |
| O | 0.54093400  | -1.52284700 | -1.76059000 |
| O | 1.73168500  | 0.29950200  | -3.06175700 |
| C | 3.06048800  | -1.20812200 | -1.35719400 |
| C | 4.26430800  | -0.65522900 | -1.76553500 |
| C | 3.02466800  | -2.32781700 | -0.52492500 |
| C | 5.46126000  | -1.18409400 | -1.29559600 |
| H | 4.25891000  | 0.20300200  | -2.42980300 |
| C | 4.21181600  | -2.86241600 | -0.05961700 |
| H | 2.06618600  | -2.75601100 | -0.25165900 |
| C | 5.43079000  | -2.27091100 | -0.41681300 |

|   |             |             |             |
|---|-------------|-------------|-------------|
| H | 6.39754100  | -0.73237400 | -1.59751500 |
| H | 4.23061400  | -3.72367400 | 0.59869800  |
| O | 6.53325000  | -2.82395700 | 0.14145400  |
| C | 7.78048700  | -2.22487000 | -0.14240000 |
| H | 7.79120000  | -1.17298600 | 0.16726300  |
| H | 8.52153800  | -2.78213800 | 0.42956400  |
| H | 8.02163400  | -2.29070200 | -1.20978600 |
| H | -0.86405000 | -0.84188300 | -0.04931700 |
| H | -0.78370300 | 1.29716200  | -2.90291900 |
| H | -1.74533500 | -0.02547300 | -2.09655400 |

M3B

|   |             |             |             |
|---|-------------|-------------|-------------|
| C | -0.25892600 | 0.49514200  | -1.21225600 |
| C | -0.77445700 | 1.08482100  | -2.28577400 |
| C | -1.01592200 | -0.17384500 | -0.08514000 |
| C | -2.51280700 | -0.00375600 | -0.23145400 |
| O | -3.09837300 | 1.04545300  | -0.10072500 |
| O | -3.11875800 | -1.15641600 | -0.53408500 |
| C | -4.54559700 | -1.09289900 | -0.61590900 |
| H | -4.92872600 | -0.54431000 | 0.25039300  |
| H | -4.82032400 | -0.52282400 | -1.51142800 |
| C | -5.08671100 | -2.49608500 | -0.66048600 |
| C | -6.33258000 | -2.76873700 | -0.09564800 |
| C | -4.37038600 | -3.52701600 | -1.27037800 |
| C | -6.86515700 | -4.05340600 | -0.14686100 |
| H | -6.88533800 | -1.97073900 | 0.39432200  |
| C | -4.90042100 | -4.81328700 | -1.31436200 |
| H | -3.39347900 | -3.31908900 | -1.69533900 |
| C | -6.14826800 | -5.07939300 | -0.75622100 |
| H | -7.83469100 | -4.25370600 | 0.29798600  |
| H | -4.33596700 | -5.61072000 | -1.78717900 |
| H | -6.55818800 | -6.08359400 | -0.79236800 |
| N | -0.12518900 | 3.47725000  | 0.44589200  |
| C | -1.51506200 | 3.79308700  | 0.14541300  |
| H | -1.80094200 | 3.18871800  | -0.72221600 |
| H | -2.13659600 | 3.44790000  | 0.98167900  |
| C | -1.83666800 | 5.27176400  | -0.10375700 |
| H | -1.48627600 | 5.57064400  | -1.11337800 |
| H | -1.29263200 | 5.89399200  | 0.61853300  |
| C | 0.79586600  | 3.86272800  | -0.60511900 |
| H | 1.78563900  | 3.44944800  | -0.38400400 |
| H | 0.45468500  | 3.44756600  | -1.55856400 |
| H | 0.90328900  | 4.95639800  | -0.71755900 |
| C | 0.32402100  | 3.93863700  | 1.74436800  |

|   |             |             |             |
|---|-------------|-------------|-------------|
| H | -0.36747600 | 3.59097100  | 2.51928900  |
| H | 1.31229000  | 3.51152300  | 1.94821300  |
| H | 0.40967000  | 5.03625900  | 1.83009000  |
| N | -3.25771500 | 5.54696600  | 0.06117900  |
| C | -4.06989100 | 4.75834800  | -0.85190400 |
| H | -5.12329500 | 5.01548800  | -0.70895000 |
| H | -3.81243900 | 4.94477400  | -1.91283500 |
| H | -3.95388800 | 3.69100500  | -0.64880000 |
| C | -3.52277700 | 6.96109300  | -0.12216700 |
| H | -3.27792800 | 7.31208200  | -1.14286700 |
| H | -4.58086700 | 7.16716400  | 0.06379300  |
| H | -2.93016000 | 7.54406600  | 0.58895600  |
| C | -0.53246700 | 0.40895600  | 1.25554500  |
| C | 0.94902400  | 0.61865300  | 1.27817200  |
| H | -1.00853400 | 1.39756400  | 1.35885500  |
| H | 1.38307000  | 0.90810300  | 2.22901100  |
| C | 1.72863000  | 0.56956600  | 0.18999600  |
| C | -0.97322000 | -0.42404700 | 2.44862800  |
| O | -0.34571200 | -0.56748700 | 3.46817100  |
| O | -2.17728700 | -0.97095300 | 2.23330800  |
| C | -2.70172900 | -1.80886300 | 3.27507900  |
| C | -3.96720500 | -2.43477900 | 2.73185000  |
| H | -2.88215700 | -1.19546500 | 4.16309700  |
| H | -1.94606100 | -2.55630000 | 3.53352000  |
| H | -3.75615300 | -2.99260000 | 1.81576700  |
| H | -4.39794900 | -3.11740200 | 3.46805100  |
| H | -4.70871800 | -1.66511700 | 2.50035000  |
| C | 3.17477900  | 0.90237400  | 0.23745000  |
| C | 3.95496300  | 0.51252900  | 1.32978600  |
| C | 3.77438800  | 1.60848500  | -0.81322500 |
| C | 5.30647900  | 0.83843200  | 1.38124000  |
| H | 3.50213000  | -0.07495400 | 2.12316100  |
| C | 5.12569300  | 1.93314600  | -0.75742700 |
| H | 3.17368100  | 1.88067400  | -1.67657000 |
| C | 5.89630800  | 1.55012500  | 0.33898100  |
| H | 5.90093900  | 0.52534400  | 2.23463400  |
| H | 5.57943800  | 2.48494200  | -1.57476500 |
| H | 6.95136800  | 1.80319200  | 0.37874800  |
| N | 1.16848400  | 0.35518000  | -1.10741100 |
| S | 1.70841200  | -1.00450300 | -2.06225200 |
| O | 0.61669100  | -1.97119300 | -2.07226800 |
| O | 2.21128200  | -0.45883700 | -3.31165200 |
| C | 3.04713600  | -1.69885700 | -1.15064200 |
| C | 4.34816100  | -1.40553900 | -1.53459000 |

|   |             |             |             |
|---|-------------|-------------|-------------|
| C | 2.77522200  | -2.47059700 | -0.01929800 |
| C | 5.40940700  | -1.85538200 | -0.75992900 |
| H | 4.51980300  | -0.80644000 | -2.42246300 |
| C | 3.82869300  | -2.91606200 | 0.75575500  |
| H | 1.74858700  | -2.70406000 | 0.24433500  |
| C | 5.14615900  | -2.58691700 | 0.40261800  |
| H | 6.42182300  | -1.60668800 | -1.05074700 |
| H | 3.66699400  | -3.50439400 | 1.65180600  |
| O | 6.10070300  | -3.01865200 | 1.25474000  |
| C | 7.43679600  | -2.63426200 | 0.99526700  |
| H | 7.53020300  | -1.54255800 | 0.95577200  |
| H | 8.02860800  | -3.02325000 | 1.82275300  |
| H | 7.80004500  | -3.06427500 | 0.05498400  |
| H | -0.78200800 | -1.24329200 | -0.14123100 |
| H | -0.11591200 | 1.47474000  | -3.05406300 |
| H | -1.84641000 | 1.17524500  | -2.41989300 |

TS4B

|   |             |             |             |
|---|-------------|-------------|-------------|
| C | -0.53649600 | -1.32346300 | 0.13521800  |
| C | -1.01521100 | -2.44582500 | 0.77227500  |
| C | -1.27182800 | -0.39383400 | -0.68926400 |
| C | -2.45939900 | -0.72019400 | -1.43927700 |
| O | -2.93422800 | -0.00909100 | -2.31290700 |
| O | -3.12274100 | -1.84385300 | -1.00979700 |
| C | -4.47450800 | -1.95451700 | -1.46800000 |
| H | -4.53551300 | -1.67423000 | -2.52017600 |
| H | -4.73177400 | -3.00873600 | -1.34662200 |
| C | -5.35717200 | -1.07867100 | -0.61104900 |
| C | -5.76277700 | -1.52658600 | 0.65201300  |
| C | -5.71158800 | 0.20877600  | -1.02421300 |
| C | -6.51903200 | -0.70461800 | 1.48795500  |
| H | -5.49784100 | -2.53300500 | 0.97093800  |
| C | -6.48586100 | 1.01978000  | -0.19798200 |
| H | -5.36079000 | 0.56508600  | -1.98769000 |
| C | -6.88814000 | 0.56761100  | 1.05769500  |
| H | -6.83318700 | -1.06374300 | 2.46267000  |
| H | -6.76807200 | 2.01439700  | -0.53039200 |
| H | -7.48525600 | 1.20642000  | 1.70048900  |
| C | -0.63123800 | 0.89073900  | -1.17477100 |
| C | 0.50786900  | 1.30217600  | -0.28380300 |
| H | -0.29645900 | 0.82810700  | -2.22041400 |
| H | 0.74973400  | 2.35735600  | -0.20575500 |
| C | 1.18158300  | 0.42676500  | 0.46885900  |
| C | -1.62754500 | 2.04862300  | -1.16884200 |

|   |             |             |             |
|---|-------------|-------------|-------------|
| O | -1.59533700 | 2.98679500  | -1.92062300 |
| O | -2.48503300 | 1.95887700  | -0.12881400 |
| C | -3.43358900 | 3.02308400  | 0.00203600  |
| C | -4.01975800 | 2.92755300  | 1.39390300  |
| H | -4.19530200 | 2.90156500  | -0.77626700 |
| H | -2.92616700 | 3.97570600  | -0.16968000 |
| H | -4.78857700 | 3.69241500  | 1.53223200  |
| H | -4.47802900 | 1.94808400  | 1.55277700  |
| H | -3.24172600 | 3.07278800  | 2.14673400  |
| C | 2.28224000  | 0.83309900  | 1.37570900  |
| C | 2.45127300  | 0.21655600  | 2.61965600  |
| C | 3.17675000  | 1.83160200  | 0.97763400  |
| C | 3.49687700  | 0.60383200  | 3.45221300  |
| H | 1.77597700  | -0.57989300 | 2.91573600  |
| C | 4.21747800  | 2.21742600  | 1.81337000  |
| H | 3.07687500  | 2.26998500  | -0.01113500 |
| C | 4.38195600  | 1.60238700  | 3.05289700  |
| H | 3.62205900  | 0.12021900  | 4.41581100  |
| H | 4.91471900  | 2.98286100  | 1.48735700  |
| H | 5.20197700  | 1.89496100  | 3.70086400  |
| N | 0.79589200  | -0.94183600 | 0.48590700  |
| S | 1.97900000  | -2.18948500 | 0.23609300  |
| O | 2.28602500  | -2.78602200 | 1.52715200  |
| O | 1.49017300  | -3.01722100 | -0.85221000 |
| C | 3.40003600  | -1.29894800 | -0.32175400 |
| C | 3.36937400  | -0.67805700 | -1.56263200 |
| C | 4.52639800  | -1.23893600 | 0.49953100  |
| C | 4.47625600  | 0.04653700  | -1.99234900 |
| H | 2.48405900  | -0.75358500 | -2.18751000 |
| C | 5.62977000  | -0.52751600 | 0.07108400  |
| H | 4.50896500  | -1.73106800 | 1.46601200  |
| C | 5.60586200  | 0.12563300  | -1.16927300 |
| H | 4.44868900  | 0.53629300  | -2.95740300 |
| H | 6.52357500  | -0.44632500 | 0.67894900  |
| O | 6.72760200  | 0.80896400  | -1.48704700 |
| C | 6.77163000  | 1.46398100  | -2.73881800 |
| H | 5.99456100  | 2.23344600  | -2.81342400 |
| H | 7.75249400  | 1.93344100  | -2.79959600 |
| H | 6.65740700  | 0.75132400  | -3.56345300 |
| H | -2.25680800 | -0.05680000 | 0.63219200  |
| H | -2.17677200 | -1.29775700 | 1.55040600  |
| H | -1.86613000 | -2.97795600 | 0.37147700  |
| H | -0.34655900 | -2.98408900 | 1.43408500  |
| O | -2.76369400 | -0.43195700 | 1.52205600  |

|   |             |             |            |
|---|-------------|-------------|------------|
| H | -3.67077000 | -0.67454800 | 1.24937000 |
|---|-------------|-------------|------------|

M4B

|   |             |             |             |
|---|-------------|-------------|-------------|
| C | -0.48465300 | -1.37041900 | 0.10412800  |
| C | -0.93898600 | -2.74706800 | 0.52221500  |
| C | -1.22227700 | -0.45842400 | -0.55662000 |
| C | -2.58734700 | -0.69611800 | -1.08130900 |
| O | -3.03326500 | -0.03431100 | -1.99592800 |
| O | -3.27623400 | -1.68045500 | -0.48672000 |
| C | -4.59943500 | -1.91221200 | -1.00801300 |
| H | -4.56494800 | -1.85071700 | -2.09756300 |
| H | -4.83090400 | -2.93453000 | -0.70365100 |
| C | -5.61395200 | -0.94667200 | -0.44671400 |
| C | -6.25842300 | -1.23089600 | 0.75914600  |
| C | -5.93549600 | 0.22880200  | -1.13079800 |
| C | -7.21580600 | -0.36047800 | 1.27339600  |
| H | -6.01304000 | -2.14527800 | 1.29349100  |
| C | -6.89414000 | 1.09897400  | -0.61822800 |
| H | -5.42177900 | 0.45547000  | -2.05956800 |
| C | -7.53719300 | 0.80506100  | 0.58181400  |
| H | -7.71401200 | -0.59417200 | 2.20878000  |
| H | -7.14155200 | 2.00663300  | -1.16015800 |
| H | -8.28646100 | 1.48320900  | 0.97813300  |
| C | -0.68574200 | 0.90854900  | -0.92263200 |
| C | 0.48693600  | 1.26232100  | -0.05054000 |
| H | -0.41636500 | 0.95848100  | -1.98640900 |
| H | 0.70991800  | 2.31269400  | 0.10648600  |
| C | 1.20383200  | 0.34008500  | 0.59818700  |
| C | -1.73843100 | 2.00239400  | -0.74562700 |
| O | -1.76600500 | 3.01844500  | -1.39137900 |
| O | -2.56704800 | 1.72705200  | 0.26820300  |
| C | -3.65641200 | 2.64265100  | 0.45102500  |
| C | -4.44153500 | 2.15430100  | 1.64662400  |
| H | -4.26036900 | 2.64061000  | -0.46251000 |
| H | -3.25301500 | 3.64977800  | 0.59069400  |
| H | -5.32169700 | 2.78338200  | 1.80148600  |
| H | -4.77870000 | 1.12770000  | 1.48014900  |
| H | -3.82569000 | 2.18179200  | 2.54879500  |
| C | 2.34242500  | 0.68298300  | 1.48237300  |
| C | 2.60001100  | -0.05013100 | 2.64532300  |
| C | 3.18981300  | 1.74059100  | 1.13596200  |
| C | 3.68737300  | 0.28031100  | 3.44898100  |
| H | 1.95919600  | -0.88834700 | 2.90032600  |
| C | 4.27072500  | 2.07000900  | 1.94371900  |

|   |             |             |             |
|---|-------------|-------------|-------------|
| H | 3.02002400  | 2.27404700  | 0.20529900  |
| C | 4.52461800  | 1.33784300  | 3.10177300  |
| H | 3.88212600  | -0.29358700 | 4.34935300  |
| H | 4.92875600  | 2.88454400  | 1.65789600  |
| H | 5.37596500  | 1.58693100  | 3.72708800  |
| N | 0.83510700  | -1.03327200 | 0.52278900  |
| S | 2.03534600  | -2.20716600 | 0.03832400  |
| O | 2.43068100  | -2.95282600 | 1.22157400  |
| O | 1.46084100  | -2.89779300 | -1.10645100 |
| C | 3.40652100  | -1.23557600 | -0.49704200 |
| C | 3.29164000  | -0.47343700 | -1.65182400 |
| C | 4.57027700  | -1.22951000 | 0.27378800  |
| C | 4.34887600  | 0.34324300  | -2.03831500 |
| H | 2.38002200  | -0.51060600 | -2.24118300 |
| C | 5.62543000  | -0.42915300 | -0.11536700 |
| H | 4.61640200  | -1.83179700 | 1.17448500  |
| C | 5.51360600  | 0.37170700  | -1.26127700 |
| H | 4.25823400  | 0.94336500  | -2.93488300 |
| H | 6.54439200  | -0.38364500 | 0.45753500  |
| O | 6.58776300  | 1.14122600  | -1.53716400 |
| C | 6.52298800  | 1.99227300  | -2.66475200 |
| H | 5.70105600  | 2.71139200  | -2.57133300 |
| H | 7.47141200  | 2.52662200  | -2.69383900 |
| H | 6.40018200  | 1.41796500  | -3.58990900 |
| H | -1.20919400 | -3.35002500 | -0.34529000 |
| H | -0.15081800 | -3.25749300 | 1.07515800  |
| H | -1.81574800 | -2.65957700 | 1.16496200  |

### M3C

|   |             |             |             |
|---|-------------|-------------|-------------|
| C | -0.51177100 | -0.25881500 | -0.56159600 |
| C | -1.20117700 | -1.35606100 | -0.90290500 |
| C | -1.18258500 | 1.05932100  | -0.21867100 |
| C | -2.52116200 | 1.20727900  | -0.91523200 |
| O | -2.65547000 | 1.59862500  | -2.04418200 |
| O | -3.53216800 | 0.82513000  | -0.10926900 |
| C | -4.86841900 | 0.94803300  | -0.64839100 |
| H | -5.47724300 | 1.35258700  | 0.16267200  |
| H | -4.84504100 | 1.65566900  | -1.47895100 |
| C | -5.35344000 | -0.41086300 | -1.07618000 |
| C | -6.38623300 | -1.05429800 | -0.39492300 |
| C | -4.70835700 | -1.07145800 | -2.12780600 |
| C | -6.76083400 | -2.35222800 | -0.74265400 |
| H | -6.90160700 | -0.53824700 | 0.41156900  |
| C | -5.07016000 | -2.37278500 | -2.46496000 |



|   |             |             |             |
|---|-------------|-------------|-------------|
| H | -3.92675100 | -0.55574800 | -2.68164100 |
| C | -6.09449500 | -3.01716600 | -1.76898900 |
| H | -7.57370800 | -2.84116100 | -0.21533600 |
| H | -4.56796800 | -2.87697900 | -3.28441300 |
| H | -6.38499500 | -4.02651100 | -2.04155000 |
| N | -1.89682900 | -0.02328400 | 2.91090700  |
| C | -2.53302800 | -1.06078900 | 3.70885000  |
| H | -2.22800400 | -1.03568300 | 4.76899200  |
| H | -3.61559800 | -0.90314700 | 3.68954300  |
| C | -2.21205900 | -2.44357500 | 3.15809000  |
| H | -2.83791400 | -3.21386200 | 3.61705400  |
| H | -1.16418300 | -2.71099500 | 3.31508000  |
| C | -0.46380900 | 0.06256300  | 3.19475800  |
| H | -0.01649900 | 0.85643300  | 2.59107700  |
| H | -0.26308900 | 0.27676400  | 4.25687300  |
| H | 0.04755300  | -0.86788800 | 2.92560100  |
| N | -2.44742100 | -2.49298700 | 1.67876500  |
| C | -3.85984300 | -2.17763300 | 1.30636500  |
| H | -4.00020500 | -2.39024100 | 0.24515900  |
| H | -4.52902700 | -2.79841800 | 1.90529200  |
| H | -4.02830700 | -1.11591000 | 1.48189500  |
| C | -2.01512900 | -3.79739200 | 1.10968900  |
| H | -2.60309100 | -4.58986500 | 1.57540100  |
| H | -2.18774600 | -3.78768000 | 0.03438100  |
| H | -0.95457400 | -3.94235900 | 1.31638600  |
| C | -0.26164400 | 2.23200400  | -0.56778200 |
| C | 1.02879800  | 2.00818500  | 0.17141800  |
| H | 1.45095800  | 2.81698700  | 0.75885100  |
| C | 1.56259800  | 0.78102300  | 0.21418600  |
| C | -0.92135600 | 3.52797700  | -0.13517500 |
| O | -1.99550300 | 3.58375800  | 0.42173100  |
| O | -0.16520600 | 4.58114200  | -0.41911900 |
| C | -0.71152000 | 5.86859900  | -0.05697400 |
| C | 0.27297100  | 6.91789300  | -0.51823500 |
| H | -0.86489100 | 5.88604500  | 1.02587200  |
| H | -1.68833400 | 5.97306300  | -0.53619400 |
| H | 0.41413700  | 6.86358000  | -1.59942100 |
| H | -0.10342100 | 7.91172600  | -0.26673000 |
| H | 1.24146500  | 6.78139900  | -0.03248900 |
| C | 2.74513100  | 0.42416400  | 1.03528500  |
| C | 2.92901800  | -0.88454500 | 1.49190400  |
| C | 3.69261600  | 1.39744700  | 1.37496500  |
| C | 4.03399600  | -1.21176100 | 2.27193700  |
| H | 2.21285400  | -1.64791100 | 1.20253000  |

|   |              |              |              |
|---|--------------|--------------|--------------|
| C | 4. 78941700  | 1. 07196300  | 2. 16330900  |
| H | 3. 59177000  | 2. 40679100  | 0. 98776700  |
| C | 4. 96620000  | -0. 23534700 | 2. 61276800  |
| H | 4. 17277500  | -2. 23490100 | 2. 60664400  |
| H | 5. 51696100  | 1. 83757100  | 2. 41316500  |
| H | 5. 82825000  | -0. 49321200 | 3. 21927000  |
| N | 0. 91890400  | -0. 28675200 | -0. 51905900 |
| S | 1. 63901500  | -0. 51947400 | -2. 12036800 |
| O | 0. 93314400  | -1. 64030600 | -2. 71212800 |
| O | 1. 66805100  | 0. 78129400  | -2. 76836800 |
| C | 3. 27111300  | -1. 01660700 | -1. 71685200 |
| C | 4. 26909100  | -0. 05845900 | -1. 60019700 |
| C | 3. 51712300  | -2. 36700300 | -1. 45272500 |
| C | 5. 53404600  | -0. 43772800 | -1. 16796200 |
| H | 4. 04934600  | 0. 97892900  | -1. 83306900 |
| C | 4. 77351400  | -2. 74682000 | -1. 02960500 |
| H | 2. 72680300  | -3. 09746800 | -1. 58966800 |
| C | 5. 78073200  | -1. 78084400 | -0. 85952600 |
| H | 6. 30683500  | 0. 31268600  | -1. 06396900 |
| H | 5. 01528000  | -3. 78155300 | -0. 81522400 |
| O | 6. 95226600  | -2. 24802900 | -0. 39723500 |
| C | 8. 00313800  | -1. 32161500 | -0. 17982900 |
| H | 7. 70601100  | -0. 56044800 | 0. 55047100  |
| H | 8. 83705100  | -1. 90110500 | 0. 21220100  |
| H | 8. 30274700  | -0. 83812100 | -1. 11573200 |
| H | -1. 37528400 | 1. 07792600  | 0. 85514100  |
| H | -1. 87553600 | -1. 73602900 | 1. 25726900  |
| H | -2. 27655800 | -1. 30052800 | -1. 05375100 |
| H | -0. 68568700 | -2. 26903400 | -1. 17195800 |
| H | -0. 08942100 | 2. 26903400  | -1. 65217600 |
| C | -2. 54574800 | 1. 26927200  | 3. 14676100  |
| H | -2. 09966400 | 2. 03834100  | 2. 51098600  |
| H | -3. 60313100 | 1. 20128600  | 2. 87851500  |
| H | -2. 46145500 | 1. 58644200  | 4. 19807900  |

#### TS4C

|   |              |              |              |
|---|--------------|--------------|--------------|
| C | -0. 45560200 | 0. 22975300  | -0. 76530300 |
| C | -0. 96278700 | -1. 06116800 | -1. 06305400 |
| C | -1. 37506700 | 1. 23551100  | -0. 09757000 |
| C | -2. 83808500 | 1. 00205800  | -0. 46130200 |
| O | -3. 31362200 | 1. 41441100  | -1. 49005600 |
| O | -3. 49153100 | 0. 31848900  | 0. 47497500  |
| C | -4. 91402700 | 0. 12697700  | 0. 25652200  |
| H | -5. 35748400 | 0. 18897700  | 1. 25107700  |

|   |             |             |             |
|---|-------------|-------------|-------------|
| H | -5.27790200 | 0.94836000  | -0.36314000 |
| C | -5.16696000 | -1.21553600 | -0.37479100 |
| C | -5.75678300 | -2.24236500 | 0.36198700  |
| C | -4.76563200 | -1.45912100 | -1.69277300 |
| C | -5.92968600 | -3.50612100 | -0.20038800 |
| H | -6.08031600 | -2.05345000 | 1.38260200  |
| C | -4.92377000 | -2.72554600 | -2.24939800 |
| H | -4.34063300 | -0.64896100 | -2.27966300 |
| C | -5.50297600 | -3.75157200 | -1.50254700 |
| H | -6.39761200 | -4.29650500 | 0.37754400  |
| H | -4.61361900 | -2.90740700 | -3.27347000 |
| H | -5.63637900 | -4.73469400 | -1.94202700 |
| N | -0.86935600 | -0.64043100 | 2.56737700  |
| C | -0.96209000 | -1.99269500 | 3.10042700  |
| H | -0.37677400 | -2.10434800 | 4.03189800  |
| H | -2.00594300 | -2.18485200 | 3.36603100  |
| C | -0.48636700 | -3.06036400 | 2.12593800  |
| H | -0.66182200 | -4.04635000 | 2.58370700  |
| H | 0.59219400  | -2.97863300 | 1.94565100  |
| C | 0.52107500  | -0.23930800 | 2.42342400  |
| H | 0.57855800  | 0.80604600  | 2.10141900  |
| H | 1.09302500  | -0.33179000 | 3.36397500  |
| H | 1.01240200  | -0.85245600 | 1.65799300  |
| N | -1.15921500 | -3.00335100 | 0.81748900  |
| C | -2.62364100 | -2.94253000 | 0.93328200  |
| H | -3.06493000 | -3.04059700 | -0.06219800 |
| H | -3.00564100 | -3.75399100 | 1.56731000  |
| H | -2.90932300 | -1.97097200 | 1.34115800  |
| C | -0.76016200 | -4.14445400 | -0.01378500 |
| H | -1.15653700 | -5.08411800 | 0.39124300  |
| H | -1.14573700 | -4.00872800 | -1.02765300 |
| H | 0.33010800  | -4.21724900 | -0.05229200 |
| C | -1.00690800 | 2.66811100  | -0.48456100 |
| C | 0.45244600  | 2.87579600  | -0.21656000 |
| H | 0.80251700  | 3.81580600  | 0.19576000  |
| C | 1.31646900  | 1.87733200  | -0.39731000 |
| C | -1.86430800 | 3.62507300  | 0.33263500  |
| O | -2.70347600 | 3.25790100  | 1.12119300  |
| O | -1.56352000 | 4.88892100  | 0.07000200  |
| C | -2.34030900 | 5.88325100  | 0.78003200  |
| C | -1.86869900 | 7.23878800  | 0.30873300  |
| H | -2.18698600 | 5.73455500  | 1.85237300  |
| H | -3.39676200 | 5.70751500  | 0.56187300  |
| H | -2.02586700 | 7.34997300  | -0.76589500 |

|   |             |             |             |
|---|-------------|-------------|-------------|
| H | -2.42932500 | 8.02176700  | 0.82352000  |
| H | -0.80697400 | 7.37633200  | 0.52385200  |
| C | 2.75043500  | 1.99201200  | -0.01703600 |
| C | 3.33182400  | 1.12124600  | 0.90794500  |
| C | 3.50855000  | 3.04597700  | -0.53599900 |
| C | 4.64929500  | 1.30772800  | 1.31471300  |
| H | 2.76425900  | 0.28398300  | 1.30080800  |
| C | 4.82533400  | 3.22868200  | -0.12984700 |
| H | 3.06452200  | 3.70113700  | -1.27887200 |
| C | 5.39800000  | 2.36103400  | 0.79867100  |
| H | 5.08751800  | 0.62525800  | 2.03601200  |
| H | 5.40684800  | 4.04567300  | -0.54352900 |
| H | 6.42487500  | 2.50733500  | 1.11714400  |
| N | 0.82301500  | 0.62147700  | -0.93785700 |
| S | 1.89393600  | -0.07617800 | -2.22635200 |
| O | 1.03253100  | -0.88194100 | -3.05787900 |
| O | 2.58289000  | 1.07718200  | -2.74898600 |
| C | 2.99076400  | -1.08636500 | -1.30666600 |
| C | 4.34859600  | -0.80125600 | -1.33508100 |
| C | 2.47544600  | -2.14972800 | -0.55916300 |
| C | 5.22522700  | -1.59751900 | -0.60677500 |
| H | 4.70995400  | 0.05308100  | -1.89956900 |
| C | 3.34100400  | -2.92644100 | 0.18074900  |
| H | 1.40796700  | -2.35486700 | -0.55775000 |
| C | 4.72407200  | -2.65680700 | 0.15875500  |
| H | 6.28425500  | -1.37497200 | -0.62842600 |
| H | 2.99514400  | -3.76294700 | 0.77872900  |
| O | 5.47469600  | -3.47069000 | 0.91171600  |
| C | 6.87976600  | -3.26101000 | 0.94171200  |
| H | 7.11673400  | -2.26792800 | 1.33819000  |
| H | 7.28022400  | -4.02424500 | 1.60563600  |
| H | 7.31403100  | -3.37629600 | -0.05629300 |
| H | -1.27468900 | 1.09822300  | 0.98352300  |
| H | -0.90803200 | -1.79186700 | 0.00012000  |
| H | -2.03912000 | -1.07757900 | -1.23840800 |
| H | -0.42151200 | -1.65200800 | -1.79330700 |
| H | -1.24658000 | 2.84130400  | -1.54369700 |
| C | -1.59024200 | 0.28779400  | 3.43529900  |
| H | -1.55536500 | 1.30039000  | 3.02100900  |
| H | -2.64095800 | -0.00767500 | 3.48877000  |
| H | -1.17533700 | 0.31725100  | 4.45659900  |

M4C

|   |             |            |             |
|---|-------------|------------|-------------|
| C | -0.52403200 | 0.61024800 | -0.57857700 |
|---|-------------|------------|-------------|

|   |             |             |             |
|---|-------------|-------------|-------------|
| C | -1.14098400 | -0.69666300 | -0.86001800 |
| C | -1.38658800 | 1.64972100  | 0.10618300  |
| C | -2.86465300 | 1.38038600  | -0.17023100 |
| O | -3.41035700 | 1.77287600  | -1.17040000 |
| O | -3.40725000 | 0.64848200  | 0.79183700  |
| C | -4.80377400 | 0.28405800  | 0.63928000  |
| H | -5.18866000 | 0.25366600  | 1.65940300  |
| H | -5.30297500 | 1.07635100  | 0.07854200  |
| C | -4.93779700 | -1.05384700 | -0.03774900 |
| C | -5.25901200 | -2.19284400 | 0.70334300  |
| C | -4.75976500 | -1.16577800 | -1.42122400 |
| C | -5.39935800 | -3.42916500 | 0.07575300  |
| H | -5.43172700 | -2.10708800 | 1.77346100  |
| C | -4.88885100 | -2.40257900 | -2.04673000 |
| H | -4.54496600 | -0.27310100 | -2.00332600 |
| C | -5.21172900 | -3.53506100 | -1.29969200 |
| H | -5.66663800 | -4.30459200 | 0.65876600  |
| H | -4.76011300 | -2.47973800 | -3.12163800 |
| H | -5.32905100 | -4.49540800 | -1.79141400 |
| N | -1.41057400 | -1.90706000 | 2.07549400  |
| C | -1.54757800 | -3.35951600 | 2.17396500  |
| H | -1.37007100 | -3.69842100 | 3.21204900  |
| H | -2.59021800 | -3.60244600 | 1.93720500  |
| C | -0.61377000 | -4.16428700 | 1.27518100  |
| H | -0.91648000 | -5.22420500 | 1.37381100  |
| H | 0.41625500  | -4.10188300 | 1.64996500  |
| C | -0.04811800 | -1.46815900 | 2.32827700  |
| H | -0.01422900 | -0.37173900 | 2.30069100  |
| H | 0.33040600  | -1.78867100 | 3.31481200  |
| H | 0.62062900  | -1.85261900 | 1.55290200  |
| N | -0.60483100 | -3.75021500 | -0.12530400 |
| C | -1.95363800 | -3.72327600 | -0.68084700 |
| H | -1.90492500 | -3.47549800 | -1.74573200 |
| H | -2.46455200 | -4.69749600 | -0.58213500 |
| H | -2.56340400 | -2.96374700 | -0.18370100 |
| C | 0.22191900  | -4.66889800 | -0.90069600 |
| H | -0.19436900 | -5.69044300 | -0.92244600 |
| H | 0.30910700  | -4.30882400 | -1.93041800 |
| H | 1.22731700  | -4.72541700 | -0.47162600 |
| C | -0.99890100 | 3.05024300  | -0.36550100 |
| C | 0.47709200  | 3.21446300  | -0.14154200 |
| H | 0.87140700  | 4.15362000  | 0.23154000  |
| C | 1.29063700  | 2.16877500  | -0.28331100 |
| C | -1.81190400 | 4.07078300  | 0.42288600  |

|   |             |             |             |
|---|-------------|-------------|-------------|
| O | -2.68146500 | 3.76076600  | 1.19970300  |
| O | -1.43525000 | 5.30934400  | 0.14167200  |
| C | -2.16985300 | 6.35948400  | 0.81970500  |
| C | -1.61901300 | 7.67845400  | 0.33199400  |
| H | -2.04146100 | 6.22249900  | 1.89678200  |
| H | -3.23022800 | 6.23458900  | 0.58634900  |
| H | -1.75352000 | 7.77894700  | -0.74673100 |
| H | -2.14595000 | 8.49840200  | 0.82429900  |
| H | -0.55523800 | 7.76455200  | 0.56321900  |
| C | 2.70847500  | 2.13757800  | 0.15603300  |
| C | 3.06799800  | 1.31198100  | 1.22580100  |
| C | 3.66185300  | 2.96518100  | -0.43851500 |
| C | 4.37473800  | 1.31708500  | 1.69973100  |
| H | 2.32310300  | 0.66443400  | 1.68282600  |
| C | 4.96986400  | 2.96645500  | 0.03847500  |
| H | 3.37734100  | 3.58389500  | -1.28360400 |
| C | 5.32614000  | 2.14445400  | 1.10568400  |
| H | 4.64872800  | 0.67935000  | 2.53387800  |
| H | 5.71026000  | 3.61105400  | -0.42320700 |
| H | 6.34522500  | 2.15408700  | 1.47855000  |
| N | 0.72694200  | 0.92860800  | -0.79216900 |
| S | 1.77966400  | 0.10090600  | -2.10337300 |
| O | 0.83725900  | -0.69596500 | -2.84650500 |
| O | 2.43853300  | 1.24834500  | -2.67238000 |
| C | 2.88735800  | -0.88375500 | -1.18967600 |
| C | 4.22686900  | -0.50685300 | -1.15713000 |
| C | 2.40968600  | -2.01419800 | -0.51365300 |
| C | 5.12692200  | -1.27418800 | -0.43249700 |
| H | 4.55305200  | 0.38945700  | -1.67585800 |
| C | 3.30524900  | -2.75486900 | 0.22796000  |
| H | 1.36123600  | -2.31102000 | -0.55572200 |
| C | 4.66650200  | -2.39410000 | 0.27323500  |
| H | 6.16910400  | -0.98318600 | -0.40753700 |
| H | 2.99330500  | -3.63373800 | 0.78197200  |
| O | 5.44133600  | -3.18375100 | 1.02366200  |
| C | 6.82914800  | -2.88939700 | 1.11186800  |
| H | 6.98941500  | -1.89646400 | 1.54498500  |
| H | 7.25216900  | -3.64705600 | 1.76804000  |
| H | 7.30340700  | -2.94798000 | 0.12718700  |
| H | -1.21678900 | 1.56375900  | 1.18983900  |
| H | -1.50210400 | -1.05831300 | 0.12908400  |
| H | -2.02545400 | -0.56719500 | -1.49417500 |
| H | -0.48231000 | -1.44386900 | -1.27991900 |
| H | -1.26667200 | 3.17424000  | -1.42547800 |

|   |             |             |            |
|---|-------------|-------------|------------|
| C | -2.33045800 | -1.27170500 | 3.01152200 |
| H | -2.26538700 | -0.18488800 | 2.92049600 |
| H | -3.35437600 | -1.56830200 | 2.76832000 |
| H | -2.12147900 | -1.55544900 | 4.05708700 |

TS5C

|   |             |             |             |
|---|-------------|-------------|-------------|
| C | 0.22624700  | 0.78521900  | -0.60265000 |
| C | 0.21668800  | 2.09212800  | 0.12263600  |
| C | 1.47553600  | 0.04755100  | -0.77503800 |
| C | 2.70871000  | 0.93425000  | -0.75014600 |
| O | 3.29477700  | 1.26350800  | -1.74867500 |
| O | 3.05423500  | 1.27755000  | 0.49566000  |
| C | 4.05214300  | 2.33192400  | 0.60349200  |
| H | 4.47678500  | 2.20125500  | 1.59937900  |
| H | 4.81783400  | 2.16753500  | -0.15550700 |
| C | 3.36521100  | 3.66114100  | 0.45052000  |
| C | 2.75081000  | 4.25517100  | 1.55547300  |
| C | 3.24429500  | 4.25666400  | -0.80767000 |
| C | 2.01073200  | 5.42366300  | 1.40560300  |
| H | 2.85639600  | 3.79901400  | 2.53722500  |
| C | 2.50314000  | 5.42657500  | -0.95752000 |
| H | 3.72265400  | 3.79334600  | -1.66523200 |
| C | 1.88223500  | 6.00684000  | 0.14628600  |
| H | 1.54273700  | 5.88481100  | 2.26915400  |
| H | 2.41369100  | 5.88748800  | -1.93566400 |
| H | 1.30896500  | 6.92051500  | 0.02771000  |
| N | 1.75939500  | -1.49458100 | 1.54801700  |
| C | 3.13950700  | -1.49937500 | 2.06862900  |
| H | 3.80600900  | -1.65367500 | 1.21459100  |
| H | 3.33976600  | -0.49572200 | 2.45461200  |
| C | 3.43303100  | -2.57374000 | 3.11606900  |
| H | 4.48609100  | -2.46170400 | 3.43837100  |
| H | 3.36199300  | -3.55784700 | 2.64015700  |
| C | 0.79527600  | -0.78499600 | 2.38437700  |
| H | -0.11107900 | -0.59282700 | 1.79150900  |
| H | 0.52755500  | -1.35490400 | 3.28047400  |
| H | 1.21896800  | 0.17965500  | 2.67907200  |
| N | 2.51251500  | -2.56009400 | 4.24542400  |
| C | 2.76232100  | -1.42563700 | 5.12337300  |
| H | 2.03767500  | -1.42881900 | 5.94179300  |
| H | 3.77696300  | -1.44903300 | 5.55862600  |
| H | 2.64715200  | -0.48376000 | 4.58008500  |
| C | 2.61081600  | -3.80192800 | 5.00157200  |
| H | 3.61739500  | -3.96018600 | 5.42574200  |

|   |              |              |              |
|---|--------------|--------------|--------------|
| H | 1. 89209900  | -3. 78772500 | 5. 82475600  |
| H | 2. 37230100  | -4. 65026700 | 4. 35405400  |
| C | 1. 47491100  | -0. 82122000 | -2. 03288300 |
| C | 0. 21458600  | -1. 63962200 | -2. 03581300 |
| H | 0. 22870000  | -2. 67179600 | -2. 37095400 |
| C | -0. 90818500 | -1. 12863400 | -1. 53465000 |
| C | 2. 69718600  | -1. 72803900 | -2. 03024800 |
| O | 3. 47474900  | -1. 80956100 | -1. 10739200 |
| O | 2. 76794100  | -2. 42653400 | -3. 15489400 |
| C | 3. 90891300  | -3. 30699100 | -3. 29930800 |
| C | 5. 13453300  | -2. 52419000 | -3. 72343500 |
| H | 3. 59766300  | -4. 02422600 | -4. 05910300 |
| H | 4. 06823200  | -3. 82332300 | -2. 35008000 |
| H | 5. 41565500  | -1. 80522200 | -2. 95143400 |
| H | 5. 97095200  | -3. 20959300 | -3. 87904700 |
| H | 4. 94493400  | -1. 99205400 | -4. 65776100 |
| C | -2. 14430700 | -1. 91377600 | -1. 29422700 |
| C | -2. 58114800 | -2. 11991500 | 0. 01737100  |
| C | -2. 83858000 | -2. 49334800 | -2. 35836600 |
| C | -3. 70550100 | -2. 90139400 | 0. 26367900  |
| H | -2. 04425700 | -1. 66150900 | 0. 84463200  |
| C | -3. 96660300 | -3. 26944900 | -2. 10894600 |
| H | -2. 50560800 | -2. 30518700 | -3. 37407700 |
| C | -4. 40044000 | -3. 47334800 | -0. 79944400 |
| H | -4. 03897800 | -3. 06108900 | 1. 28379500  |
| H | -4. 50813000 | -3. 71406100 | -2. 93711600 |
| H | -5. 27748800 | -4. 08306100 | -0. 60801700 |
| N | -0. 89618200 | 0. 23741000  | -1. 06145500 |
| S | -2. 30633600 | 1. 26565900  | -1. 65829000 |
| O | -1. 75112400 | 2. 59692300  | -1. 70037500 |
| O | -2. 67611700 | 0. 53389600  | -2. 84336400 |
| C | -3. 57025100 | 1. 17297200  | -0. 45624800 |
| C | -4. 55858500 | 0. 20121400  | -0. 60051300 |
| C | -3. 62637500 | 2. 13201000  | 0. 56497800  |
| C | -5. 60390600 | 0. 15428200  | 0. 30966400  |
| H | -4. 51393000 | -0. 51112600 | -1. 41924400 |
| C | -4. 66327300 | 2. 07958900  | 1. 47085900  |
| H | -2. 89078700 | 2. 92796500  | 0. 61522700  |
| C | -5. 65579200 | 1. 08755400  | 1. 35421800  |
| H | -6. 36919300 | -0. 60228500 | 0. 19348600  |
| H | -4. 75544000 | 2. 80565100  | 2. 26996300  |
| O | -6. 61576200 | 1. 12665500  | 2. 28370000  |
| C | -7. 66835900 | 0. 17458100  | 2. 21519300  |
| H | -7. 27936500 | -0. 84403600 | 2. 31555000  |



|   |             |             |             |
|---|-------------|-------------|-------------|
| H | -8.32606800 | 0.39917800  | 3.05219500  |
| H | -8.22128800 | 0.27159400  | 1.27556100  |
| H | 1.62539200  | -0.65292400 | 0.21388200  |
| H | 0.93357900  | 2.02446700  | 0.94099900  |
| H | 0.55937000  | 2.89637100  | -0.54110700 |
| H | -0.76712200 | 2.34720400  | 0.50492600  |
| H | 1.54612200  | -0.20005900 | -2.93740000 |
| C | 1.27418400  | -2.82251900 | 1.17831600  |
| H | 0.34005600  | -2.71794100 | 0.61399700  |
| H | 2.01638900  | -3.30688900 | 0.53786100  |
| H | 1.08211900  | -3.44361100 | 2.06260500  |

### M5C

|   |             |             |             |
|---|-------------|-------------|-------------|
| C | 0.10373600  | 0.87035700  | -0.69929000 |
| C | -0.00517400 | 2.01851300  | 0.26126800  |
| C | 1.24782600  | 0.35253400  | -1.19399000 |
| C | 2.61082500  | 0.78599200  | -0.79117600 |
| O | 3.50790400  | 0.92926600  | -1.58771800 |
| O | 2.77058800  | 0.89884600  | 0.54485800  |
| C | 4.00481700  | 1.53044100  | 0.98432000  |
| H | 4.14925800  | 1.16010000  | 2.00182300  |
| H | 4.81867000  | 1.18681200  | 0.34384100  |
| C | 3.85611000  | 3.02518200  | 0.96062100  |
| C | 3.29949800  | 3.68671000  | 2.05765500  |
| C | 4.22166600  | 3.75483300  | -0.17279800 |
| C | 3.10798800  | 5.06395200  | 2.02477500  |
| H | 3.02405700  | 3.11984100  | 2.94415100  |
| C | 4.03103600  | 5.13327000  | -0.20452400 |
| H | 4.64966600  | 3.23698600  | -1.02608800 |
| C | 3.47436400  | 5.78722900  | 0.89173200  |
| H | 2.68182600  | 5.57360600  | 2.88257200  |
| H | 4.31975400  | 5.69799300  | -1.08458700 |
| H | 3.33046800  | 6.86231600  | 0.86586200  |
| N | 1.50893300  | -2.10839100 | 1.13867300  |
| C | 2.86904100  | -2.21062100 | 1.77997000  |
| H | 3.54756700  | -2.52642700 | 0.98354100  |
| H | 3.13834000  | -1.19134400 | 2.06389700  |
| C | 2.94284000  | -3.18788700 | 2.94397600  |
| H | 3.98134600  | -3.15823200 | 3.32254800  |
| H | 2.78502400  | -4.20477500 | 2.57037900  |
| C | 0.57900800  | -1.17113500 | 1.83039200  |
| H | -0.32698800 | -1.09821900 | 1.22540700  |
| H | 0.36185000  | -1.58187500 | 2.81533200  |
| H | 1.06228900  | -0.19499800 | 1.89071800  |

|   |              |              |              |
|---|--------------|--------------|--------------|
| N | 1. 96421500  | -2. 92691700 | 3. 98863300  |
| C | 2. 31494300  | -1. 74183400 | 4. 76478200  |
| H | 1. 55108100  | -1. 56770600 | 5. 52594800  |
| H | 3. 29048400  | -1. 84823800 | 5. 26789900  |
| H | 2. 35366300  | -0. 85479800 | 4. 12517900  |
| C | 1. 83969900  | -4. 08313900 | 4. 87247200  |
| H | 2. 78442200  | -4. 32112100 | 5. 38857100  |
| H | 1. 07674100  | -3. 88291400 | 5. 62759600  |
| H | 1. 52957800  | -4. 95952100 | 4. 29671600  |
| C | 1. 19763800  | -0. 66643900 | -2. 32627000 |
| C | 0. 02187300  | -1. 58044100 | -2. 06516800 |
| H | 0. 09279500  | -2. 63772700 | -2. 30313300 |
| C | -1. 08692500 | -1. 10050500 | -1. 49328200 |
| C | 2. 46278600  | -1. 50426300 | -2. 30990700 |
| O | 2. 82264900  | -2. 09670700 | -1. 29953100 |
| O | 3. 08044200  | -1. 55474700 | -3. 46250100 |
| C | 4. 34172000  | -2. 26744000 | -3. 50993900 |
| C | 5. 44990700  | -1. 40138400 | -2. 94715800 |
| H | 4. 48462200  | -2. 47942300 | -4. 56919400 |
| H | 4. 23099400  | -3. 20425100 | -2. 95982200 |
| H | 5. 27719000  | -1. 19684000 | -1. 88890500 |
| H | 6. 40755600  | -1. 91562900 | -3. 05671200 |
| H | 5. 49707400  | -0. 45016000 | -3. 48016900 |
| C | -2. 25979200 | -1. 93657900 | -1. 14607000 |
| C | -2. 88304500 | -1. 78474000 | 0. 09771700  |
| C | -2. 72746600 | -2. 91073300 | -2. 03380100 |
| C | -3. 94245900 | -2. 61194600 | 0. 45835700  |
| H | -2. 55465800 | -0. 99484700 | 0. 76854000  |
| C | -3. 78993400 | -3. 73152200 | -1. 67288700 |
| H | -2. 27777000 | -2. 99207200 | -3. 01856500 |
| C | -4. 39584500 | -3. 58779200 | -0. 42511400 |
| H | -4. 42010800 | -2. 48371600 | 1. 42439000  |
| H | -4. 15747500 | -4. 47461500 | -2. 37252300 |
| H | -5. 22819700 | -4. 22673300 | -0. 14947800 |
| N | -1. 12471700 | 0. 26015400  | -1. 06717000 |
| S | -2. 34613200 | 1. 23668700  | -1. 85994500 |
| O | -1. 69837700 | 2. 50681700  | -2. 12184600 |
| O | -2. 85304400 | 0. 39004500  | -2. 91988700 |
| C | -3. 62228200 | 1. 48151700  | -0. 67201400 |
| C | -4. 71520500 | 0. 62213600  | -0. 66657900 |
| C | -3. 54164300 | 2. 56126200  | 0. 21306200  |
| C | -5. 73465600 | 0. 81566600  | 0. 25901000  |
| H | -4. 76968100 | -0. 18800100 | -1. 38708900 |
| C | -4. 55235800 | 2. 75351500  | 1. 13288500  |

|   |             |             |             |
|---|-------------|-------------|-------------|
| H | -2.71085400 | 3.25600200  | 0.15239700  |
| C | -5.65191700 | 1.87923100  | 1.16573600  |
| H | -6.58676900 | 0.14793600  | 0.25473600  |
| H | -4.53650300 | 3.58494900  | 1.82791300  |
| O | -6.57925900 | 2.15483400  | 2.09775100  |
| C | -7.73941000 | 1.34176000  | 2.15384900  |
| H | -7.48104400 | 0.30167400  | 2.38106000  |
| H | -8.35086000 | 1.74857500  | 2.95711400  |
| H | -8.29551900 | 1.38547600  | 1.21153100  |
| H | 1.71691500  | -1.73756300 | 0.19370100  |
| H | 0.95803800  | 2.26548800  | 0.70293500  |
| H | -0.37157500 | 2.89873000  | -0.27185300 |
| H | -0.72270600 | 1.77187500  | 1.05080700  |
| H | 1.11629500  | -0.16754200 | -3.29987900 |
| C | 0.86174500  | -3.42896400 | 0.90764200  |
| H | -0.04274800 | -3.25957900 | 0.32027400  |
| H | 1.55494500  | -4.06349500 | 0.35393600  |
| H | 0.60708700  | -3.86417300 | 1.87432000  |

TS2A'

|   |             |             |             |
|---|-------------|-------------|-------------|
| C | 1.79178800  | 1.24884300  | 0.21377800  |
| C | 0.76529600  | 0.83972400  | 1.03622700  |
| C | 3.06419100  | 0.66706200  | 0.28415400  |
| H | 1.02415500  | 0.12766600  | 1.80933500  |
| H | -0.18808000 | 1.33646200  | 1.12935200  |
| C | 4.20731800  | 0.65735000  | -0.56595200 |
| O | 4.50041200  | 1.35734700  | -1.53843300 |
| O | 5.07394100  | -0.31862300 | -0.14969000 |
| C | 6.24329400  | -0.48196100 | -0.93425600 |
| H | 5.98117100  | -0.48422500 | -1.99683800 |
| H | 6.91521200  | 0.37154000  | -0.77346700 |
| C | 6.91664400  | -1.77379400 | -0.54624200 |
| C | 6.59544800  | -2.45440100 | 0.62782900  |
| C | 7.90773200  | -2.29135000 | -1.38215800 |
| C | 7.25606100  | -3.63693500 | 0.95603800  |
| H | 5.82627600  | -2.05289200 | 1.27942100  |
| C | 8.57052800  | -3.46776000 | -1.05237400 |
| H | 8.15723400  | -1.76846000 | -2.30241500 |
| C | 8.24460400  | -4.14652600 | 0.11993200  |
| H | 6.99875500  | -4.15904100 | 1.87304000  |
| H | 9.33679400  | -3.85928300 | -1.71394300 |
| H | 8.75814600  | -5.06710400 | 0.37783400  |
| N | 1.46232300  | 2.28052500  | -0.84107900 |
| C | 2.44547800  | 3.43082800  | -0.77706800 |

|   |             |             |             |
|---|-------------|-------------|-------------|
| H | 3.41531500  | 3.01195800  | -1.03805600 |
| H | 2.14776700  | 4.12893600  | -1.56401800 |
| C | 2.47233200  | 4.12946800  | 0.57919400  |
| H | 2.36064500  | 3.39220300  | 1.39584900  |
| H | 1.63538800  | 4.83150200  | 0.65485300  |
| C | 0.07294600  | 2.83428400  | -0.70252300 |
| H | -0.67106800 | 2.04727400  | -0.82119600 |
| H | -0.04169600 | 3.29310400  | 0.27784900  |
| H | -0.05377600 | 3.58577600  | -1.48148700 |
| C | 1.55741000  | 1.64109200  | -2.20245500 |
| H | 2.59676100  | 1.38087800  | -2.39155000 |
| H | 0.94209900  | 0.74317200  | -2.20719700 |
| H | 1.19999800  | 2.36987600  | -2.93177100 |
| N | 3.70915500  | 4.88830800  | 0.69200500  |
| C | 4.84548200  | 4.01963900  | 0.97701700  |
| H | 5.75382600  | 4.62581600  | 1.02437100  |
| H | 4.72883700  | 3.48675900  | 1.93776500  |
| H | 4.98222300  | 3.27616300  | 0.18802000  |
| C | 3.59371000  | 5.91162500  | 1.71808500  |
| H | 3.40854700  | 5.48899800  | 2.72237700  |
| H | 4.51984800  | 6.49065800  | 1.75884300  |
| H | 2.77483600  | 6.59379600  | 1.47388000  |
| C | -0.34564000 | -0.87974800 | -0.16541900 |
| C | -1.34810800 | -1.31123000 | 0.65723600  |
| H | -0.60784500 | -0.15382400 | -0.92664700 |
| H | -1.23794000 | -2.18201300 | 1.29360000  |
| C | -2.53392100 | -0.49933100 | 0.75984500  |
| C | 0.93939500  | -1.56810900 | -0.43084400 |
| O | 1.52482700  | -1.45748100 | -1.48634000 |
| O | 1.40482900  | -2.27283200 | 0.60584900  |
| C | 2.67471100  | -2.92053100 | 0.38123700  |
| C | 3.12530900  | -3.49677500 | 1.70403600  |
| H | 3.38498900  | -2.18430300 | -0.00648100 |
| H | 2.53833600  | -3.69462600 | -0.38007400 |
| H | 4.08147400  | -4.00929600 | 1.56999000  |
| H | 3.25933700  | -2.70166300 | 2.44265700  |
| H | 2.39520400  | -4.21062100 | 2.09249900  |
| C | -3.73976100 | -1.10053900 | 1.39732900  |
| C | -4.33799200 | -0.50468800 | 2.51143000  |
| C | -4.26577200 | -2.28505400 | 0.87320600  |
| C | -5.46145100 | -1.09061500 | 3.08665900  |
| H | -3.93298600 | 0.42054900  | 2.90600600  |
| C | -5.40460500 | -2.85074800 | 1.43605900  |
| H | -3.79188800 | -2.74130900 | 0.00883700  |

|   |             |             |             |
|---|-------------|-------------|-------------|
| C | -6.00158000 | -2.25476100 | 2.54509200  |
| H | -5.91973800 | -0.63123600 | 3.95654900  |
| H | -5.82259700 | -3.75829800 | 1.01214400  |
| H | -6.88449100 | -2.70160300 | 2.99162400  |
| N | -2.44041700 | 0.72075500  | 0.28980900  |
| S | -3.71479500 | 1.77004700  | 0.06691800  |
| O | -4.19767600 | 2.29608200  | 1.34122500  |
| O | -3.21542400 | 2.69869200  | -0.94185200 |
| C | -5.00757800 | 0.79565300  | -0.66210600 |
| C | -4.77907400 | 0.18604200  | -1.89767500 |
| C | -6.18698700 | 0.58337400  | 0.03374900  |
| C | -5.73494300 | -0.66418900 | -2.41999200 |
| H | -3.85511600 | 0.37959600  | -2.43407500 |
| C | -7.15650400 | -0.26752200 | -0.49110800 |
| H | -6.32931400 | 1.06550100  | 0.99501000  |
| C | -6.92207100 | -0.90360400 | -1.71236600 |
| H | -5.59526600 | -1.16119600 | -3.37332100 |
| H | -8.06988500 | -0.43808100 | 0.06484300  |
| O | -7.78189300 | -1.77019400 | -2.29765700 |
| C | -8.98353700 | -2.06308900 | -1.61562500 |
| H | -9.59805200 | -1.16442400 | -1.48717000 |
| H | -9.51778000 | -2.78049500 | -2.23728600 |
| H | -8.78352200 | -2.50744600 | -0.63320000 |
| H | 3.14411900  | -0.03889100 | 1.10318300  |

#### M2A'

|   |             |             |             |
|---|-------------|-------------|-------------|
| C | 1.68311800  | 1.16069600  | 0.05436600  |
| C | 0.57457500  | 0.50931800  | 0.81910300  |
| C | 2.93321000  | 0.69417100  | 0.22713500  |
| H | 0.98660500  | 0.08642100  | 1.73644000  |
| H | -0.25310900 | 1.17400400  | 1.06770600  |
| C | 4.20966800  | 0.83225500  | -0.51078000 |
| O | 4.53979400  | 1.66223600  | -1.33358800 |
| O | 5.01181300  | -0.17180000 | -0.13637500 |
| C | 6.28428100  | -0.24790200 | -0.78988600 |
| H | 6.14134300  | -0.13644200 | -1.86860800 |
| H | 6.89605600  | 0.59589700  | -0.44963000 |
| C | 6.91996500  | -1.57051900 | -0.45366400 |
| C | 6.58847000  | -2.27358500 | 0.70485500  |
| C | 7.89136500  | -2.08516600 | -1.31253000 |
| C | 7.22422400  | -3.47782400 | 0.99680300  |
| H | 5.82900400  | -1.88053500 | 1.37344500  |
| C | 8.53150300  | -3.28344500 | -1.01582900 |
| H | 8.14499200  | -1.54644900 | -2.22200900 |

|   |              |              |              |
|---|--------------|--------------|--------------|
| C | 8. 19785600  | -3. 98407000 | 0. 14051000  |
| H | 6. 95928100  | -4. 01931100 | 1. 89976100  |
| H | 9. 28349200  | -3. 67502500 | -1. 69295400 |
| H | 8. 69211800  | -4. 92218600 | 0. 37042200  |
| N | 1. 30068400  | 2. 15580300  | -1. 00416800 |
| C | 2. 10903400  | 3. 43104800  | -0. 86217200 |
| H | 3. 15335800  | 3. 15970700  | -0. 99155700 |
| H | 1. 81261000  | 4. 06664300  | -1. 69982700 |
| C | 1. 86916700  | 4. 14758800  | 0. 46622900  |
| H | 1. 73589500  | 3. 41544600  | 1. 28745300  |
| H | 0. 94904800  | 4. 73540300  | 0. 41047800  |
| C | -0. 16650100 | 2. 53785900  | -0. 95368800 |
| H | -0. 81140900 | 1. 67308700  | -1. 09444900 |
| H | -0. 40787500 | 2. 97579800  | 0. 01155200  |
| H | -0. 32819700 | 3. 27111700  | -1. 74297000 |
| C | 1. 56362900  | 1. 54351900  | -2. 35822800 |
| H | 2. 63868400  | 1. 45801100  | -2. 49795000 |
| H | 1. 09644100  | 0. 55842300  | -2. 39143000 |
| H | 1. 13250600  | 2. 20836500  | -3. 10697100 |
| N | 2. 97813100  | 5. 05255500  | 0. 71147000  |
| C | 4. 14691900  | 4. 34853900  | 1. 21900800  |
| H | 4. 97162000  | 5. 05585500  | 1. 33539500  |
| H | 3. 95452200  | 3. 87349400  | 2. 19811500  |
| H | 4. 47279800  | 3. 57503300  | 0. 51815200  |
| C | 2. 59680900  | 6. 12098300  | 1. 62341000  |
| H | 2. 31027600  | 5. 74621600  | 2. 62186700  |
| H | 3. 43738000  | 6. 80860100  | 1. 74522900  |
| H | 1. 75501400  | 6. 68066000  | 1. 20839500  |
| C | -0. 06540600 | -0. 67783800 | -0. 00066300 |
| C | -1. 22020800 | -1. 27410000 | 0. 74301000  |
| H | -0. 44573300 | -0. 27026600 | -0. 94327500 |
| H | -1. 13518000 | -2. 24758800 | 1. 20872500  |
| C | -2. 34875500 | -0. 51839700 | 0. 84551500  |
| C | 1. 05434300  | -1. 61188300 | -0. 38702500 |
| O | 1. 51367400  | -1. 69464800 | -1. 50540300 |
| O | 1. 58215700  | -2. 25924500 | 0. 66295700  |
| C | 2. 75784800  | -3. 03826300 | 0. 37858700  |
| C | 3. 25151600  | -3. 60615800 | 1. 68999800  |
| H | 3. 50517300  | -2. 38820700 | -0. 09086000 |
| H | 2. 49835500  | -3. 82008000 | -0. 34067900 |
| H | 4. 15557500  | -4. 19570400 | 1. 51676800  |
| H | 3. 49050800  | -2. 80258300 | 2. 39265100  |
| H | 2. 49469700  | -4. 24718500 | 2. 14711900  |
| C | -3. 56647600 | -1. 09885200 | 1. 48901000  |

|   |             |             |             |
|---|-------------|-------------|-------------|
| C | -4.19100900 | -0.46781200 | 2.57016300  |
| C | -4.10845700 | -2.28416100 | 0.98438000  |
| C | -5.33603000 | -1.02134000 | 3.13402700  |
| H | -3.79260700 | 0.47049600  | 2.93975500  |
| C | -5.26034000 | -2.83001100 | 1.54326200  |
| H | -3.63269800 | -2.75467200 | 0.12926400  |
| C | -5.87663900 | -2.19895900 | 2.62034200  |
| H | -5.81395700 | -0.52570400 | 3.97355300  |
| H | -5.68026400 | -3.74290800 | 1.13113400  |
| H | -6.77695900 | -2.62060800 | 3.05732100  |
| N | -2.29681200 | 0.75279300  | 0.32601600  |
| S | -3.54645400 | 1.71655400  | 0.06006600  |
| O | -4.16642900 | 2.27038100  | 1.27206300  |
| O | -3.07208600 | 2.69545300  | -0.93423400 |
| C | -4.79500600 | 0.69801800  | -0.71403500 |
| C | -4.48165200 | 0.00257500  | -1.88282800 |
| C | -6.01436800 | 0.50502700  | -0.08510700 |
| C | -5.38982300 | -0.89763400 | -2.41007800 |
| H | -3.51782800 | 0.16096700  | -2.35773500 |
| C | -6.93660900 | -0.39946500 | -0.60956500 |
| H | -6.21987200 | 1.04249800  | 0.83469600  |
| C | -6.61570200 | -1.11115600 | -1.76559400 |
| H | -5.17668000 | -1.46261100 | -3.31089500 |
| H | -7.87830000 | -0.55463600 | -0.09768200 |
| O | -7.42630200 | -2.03822500 | -2.34266800 |
| C | -8.63915900 | -2.33292400 | -1.68701000 |
| H | -9.29695100 | -1.45632500 | -1.64663500 |
| H | -9.11980800 | -3.11728000 | -2.27145900 |
| H | -8.46165000 | -2.69414000 | -0.66635000 |
| H | 3.00784600  | -0.05863000 | 1.00603400  |
